# Supplementary material
Source: PubMed Central journal article supplement (PMC4257892)
Supplement: NIHMS636801-supplement-supp_tables_and_notes.pdf [file NIHMS636801-supplement-supp_tables_and_notes.pdf]

**Supplementary Table 1. Human depression cohort tissue quality**

|                                              | <b># Subjects</b> | <b>Age</b> | <b>post-mortem interval (hrs)</b> | <b>RNA integrity number (RIN)</b> | <b>% Male</b> |
|----------------------------------------------|-------------------|------------|-----------------------------------|-----------------------------------|---------------|
| <b>Control</b>                               | 6                 | 52.4       | 19.4                              | 8                                 | 83            |
| <b>Depressed (unmedicated and medicated)</b> | 10                | 48.4       | 17.6                              | 7.9                               | 80            |
| <b>Depressed-unmedicated</b>                 | 5                 | 42.2       | 17.1                              | 8.2                               | 80            |
| <b>Depressed-medicated</b>                   | 5                 | 54.6       | 18.2                              | 7.7                               | 80            |
| <b>p-value-unmedicated vs. medicated</b>     |                   | NS         | NS                                | NS                                |               |
| <b>p-value- control vs. depressed</b>        |                   | NS         | NS                                | NS                                |               |

**Supplementary Table 2. Predicted  $\beta$ -catenin target genes with increased  $\beta$ -catenin binding in resilient ChIP-seq**

| Gene ID | Full Name                                                        | Description                                                                                     | Expression in striatum | Citation(s)                                       |
|---------|------------------------------------------------------------------|-------------------------------------------------------------------------------------------------|------------------------|---------------------------------------------------|
| RYK     | receptor-like tyrosine kinase                                    | Wnt receptor                                                                                    |                        |                                                   |
| NNMT    | nicotinamide N-methyltransferase                                 | enzyme in nicotinate and nicotinamide metabolism                                                |                        |                                                   |
| NEUROG3 | neurogenin-3                                                     | basic helix-loop-helix (bHLH) transcription factor                                              |                        |                                                   |
| PROX1   | prospero-homeobox1                                               | transcription factor                                                                            |                        |                                                   |
| ARNTL   | aryl hydrocarbon receptor nuclear translocator-like              | basic helix-loop-helix-PAS domain transcription factor, involved in circadian rhythm generation | Yes                    | Allen Brain Atlas                                 |
| PREP    | prolyl endopeptidase                                             | involved in degradation of peptide hormones and peptidases                                      | Yes                    | Allen Brain Atlas                                 |
| CKLF5   | chemokine-like factor super family member 5                      | member of chemokine-like factor gene superfamily                                                | Yes                    | Allen Brain Atlas                                 |
| SLC5A1  | solute carrier family 5 (sodium/glucose cotransporter), member 1 |                                                                                                 | Yes                    | Allen Brain Atlas                                 |
| TPM1    | tropomyosin 1                                                    | actin binding protein                                                                           | Yes                    | Allen Brain Atlas                                 |
| SYNJ2   | synaptojanin 2                                                   | synaptic vesicle endocytosis                                                                    | Yes                    | Allen Brain Atlas                                 |
| DICER1  | dicer 1                                                          | miRNA biogenesis                                                                                | Yes                    | Cuellar 2008                                      |
| LTC4S   | leukotriene C4 synthase                                          | inflammatory processes                                                                          |                        |                                                   |
| CARD14  | caspase recruitment domain family, member 14                     | membrane-associated guanylate kinase family, NF-Kb activation                                   |                        |                                                   |
| S100A2  | S100 calcium binding protein A2                                  | tumor suppressor                                                                                |                        |                                                   |
| ACVRL1  | activin A receptor type II-like 1                                | TGF-beta receptor                                                                               | Yes                    | Allen Brain Atlas                                 |
| ACAT2   | acetyl-CoA acetyltransferase 2                                   | cholesteryl ester synthesis                                                                     |                        |                                                   |
| ABCC6   | ATP-binding cassette, sub-family C (CFTR/MRP), member 6          | multidrug resistance associated protein                                                         |                        |                                                   |
| PCK1    | phosphoenolpyruvate carboxykinase 1                              | glucose metabolism                                                                              |                        |                                                   |
| SLC7A4  | solute carrier family 7, member 4                                | transport of the cationic amino acids                                                           | Yes                    | Allen Brain Atlas                                 |
| ANKRD2  | ankyrin repeat domain 2                                          | response to stress and hypertrophy                                                              |                        |                                                   |
| SNRPA1  | small nuclear ribonucleoprotein polypeptide A                    |                                                                                                 | Yes                    | Allen Brain Atlas                                 |
| FOSB    | FBJ murine osteosarcoma viral oncogene homolog B                 | AP1 transcription factor complex member                                                         | Yes                    | Hope 1994, Chen 1995, Doucet 1996, Zachariou 2006 |

**Supplementary Table 3. Small RNA seq summary**

| sample      | read_counts.mature_miRNA | read_counts.piRNA | read_counts.rRNA | read_counts.tRNA | read_counts.RFam | read_counts.total_reads_17_26nt |
|-------------|--------------------------|-------------------|------------------|------------------|------------------|---------------------------------|
| GFP_Con_A01 | 10,777,797               | 30,936            | 64,404           | 5,721            | 109,036          | 11,988,540                      |
| GFP_Con_A02 | 8,238,047                | 25,853            | 66,780           | 3,875            | 73,168           | 9,228,031                       |
| GFP_Con_A03 | 9,690,475                | 21,654            | 57,990           | 3,656            | 72,500           | 10,677,097                      |
| GFP_Con_A04 | 11,535,649               | 25,321            | 56,659           | 5,387            | 92,783           | 12,726,174                      |
| GFP_Con_A05 | 13,207,341               | 41,630            | 94,587           | 6,389            | 139,627          | 14,666,094                      |
| GFP_Con_A06 | 11,525,476               | 29,042            | 77,239           | 5,470            | 94,540           | 12,693,107                      |
| GFP_Con_B01 | 11,736,664               | 65,241            | 96,875           | 8,372            | 180,742          | 13,280,977                      |
| GFP_Con_B02 | 9,051,798                | 51,389            | 100,447          | 6,077            | 122,671          | 10,321,439                      |
| GFP_Con_B03 | 10,609,173               | 45,870            | 82,384           | 5,300            | 122,136          | 11,845,789                      |
| GFP_Con_B04 | 12,582,379               | 65,884            | 90,393           | 8,651            | 176,055          | 14,173,213                      |
| GFP_Con_B05 | 14,359,880               | 91,650            | 152,551          | 10,208           | 236,868          | 16,272,143                      |
| GFP_Con_B06 | 12,253,199               | 67,180            | 115,480          | 8,185            | 170,263          | 13,772,186                      |
| GFP_Res_A19 | 6,432,644                | 20,680            | 45,674           | 3,155            | 76,958           | 7,169,522                       |
| GFP_Res_A20 | 11,269,703               | 32,698            | 73,720           | 7,576            | 100,159          | 12,476,703                      |
| GFP_Res_A21 | 14,979,292               | 36,729            | 76,903           | 8,718            | 119,236          | 16,600,324                      |
| GFP_Res_A22 | 10,301,853               | 27,530            | 57,858           | 5,949            | 94,457           | 11,390,217                      |
| GFP_Res_A23 | 9,560,865                | 21,717            | 70,164           | 4,105            | 82,087           | 10,535,373                      |
| GFP_Res_A24 | 10,970,253               | 38,787            | 117,415          | 9,152            | 128,628          | 12,407,270                      |
| GFP_Res_B19 | 7,041,470                | 43,029            | 68,367           | 4,749            | 120,581          | 7,968,185                       |
| GFP_Res_B20 | 12,272,607               | 55,957            | 97,038           | 9,292            | 142,132          | 13,690,253                      |
| GFP_Res_B21 | 16,357,775               | 68,401            | 107,585          | 11,617           | 180,877          | 18,316,288                      |
| GFP_Res_B22 | 11,239,506               | 56,795            | 83,101           | 8,318            | 151,426          | 12,618,685                      |
| GFP_Res_B23 | 10,213,316               | 56,592            | 105,758          | 6,229            | 154,432          | 11,496,673                      |
| GFP_Res_B24 | 11,913,401               | 76,393            | 167,376          | 12,883           | 204,045          | 13,732,244                      |
| GFP_Sus_A14 | 8,157,744                | 19,958            | 42,251           | 4,544            | 62,865           | 9,018,518                       |
| GFP_Sus_A15 | 11,856,681               | 38,973            | 102,117          | 5,273            | 126,307          | 13,256,017                      |
| GFP_Sus_B14 | 9,013,197                | 38,248            | 58,039           | 6,058            | 96,942           | 10,064,916                      |
| GFP_Sus_B15 | 13,017,331               | 88,652            | 157,575          | 8,264            | 213,491          | 14,868,735                      |
| CRE_Con_A07 | 10,569,290               | 27,003            | 55,025           | 4,477            | 88,944           | 11,672,420                      |
| CRE_Con_A08 | 14,700,257               | 41,043            | 83,136           | 7,052            | 106,128          | 16,143,451                      |
| CRE_Con_A09 | 8,790,069                | 26,492            | 70,004           | 3,356            | 83,834           | 9,715,498                       |
| CRE_Con_A10 | 10,189,033               | 30,714            | 79,153           | 4,219            | 101,724          | 11,342,112                      |
| CRE_Con_A11 | 9,457,328                | 28,175            | 87,233           | 3,673            | 114,988          | 10,603,314                      |
| CRE_Con_A12 | 10,751,542               | 27,958            | 84,124           | 4,179            | 94,876           | 11,898,681                      |
| CRE_Con_B07 | 11,476,375               | 48,444            | 72,949           | 6,032            | 131,001          | 12,792,368                      |
| CRE_Con_B08 | 15,927,029               | 67,346            | 108,447          | 8,950            | 148,577          | 17,624,212                      |
| CRE_Con_B09 | 9,581,322                | 51,514            | 94,801           | 4,962            | 132,680          | 10,731,589                      |
| CRE_Con_B10 | 11,040,690               | 59,759            | 110,121          | 6,645            | 156,721          | 12,465,818                      |
| CRE_Con_B11 | 10,350,932               | 77,388            | 134,601          | 6,530            | 224,001          | 11,946,543                      |
| CRE_Con_B12 | 11,290,699               | 63,090            | 119,867          | 6,206            | 162,369          | 12,730,349                      |
| CRE_Sus_A27 | 9,626,690                | 23,166            | 81,404           | 3,449            | 69,298           | 10,613,505                      |
| CRE_Sus_A28 | 12,425,504               | 42,014            | 135,224          | 4,640            | 135,435          | 13,898,698                      |
| CRE_Sus_A29 | 10,183,812               | 28,113            | 73,051           | 4,735            | 83,484           | 11,237,339                      |
| CRE_Sus_A30 | 12,916,356               | 36,631            | 101,589          | 4,743            | 116,965          | 14,284,007                      |
| CRE_Sus_B27 | 10,353,679               | 47,131            | 109,053          | 4,811            | 113,698          | 11,571,124                      |
| CRE_Sus_B28 | 13,191,822               | 87,117            | 196,769          | 7,598            | 219,252          | 15,088,821                      |
| CRE_Sus_B29 | 10,685,118               | 59,290            | 111,039          | 6,733            | 134,440          | 11,999,897                      |
| CRE_Sus_B30 | 13,724,882               | 74,200            | 139,312          | 7,025            | 189,258          | 15,423,779                      |

**Supplementary Table 4. Log 2 fold change of miRNA in social defeat with or without  $\beta$ -catenin deletion**

| <b>name</b>       | <b>GFP sus</b> | <b>GFP res</b> | <b>CRE con</b> | <b>CRE sus</b> |
|-------------------|----------------|----------------|----------------|----------------|
| mmu-let-7b-5p     | -0.0423        | 0.1334         | -0.0685        | -0.4746        |
| mmu-let-7c-1-3p   | -0.0490        | 0.1276         | -0.0485        | 0.2740         |
| mmu-let-7e-3p     | -0.2880        | -0.2172        | 0.2769         | 0.4380         |
| mmu-let-7j        | 0.1746         | -0.0425        | -0.1005        | 0.2258         |
| mmu-let-7k        | -0.5435        | -0.2254        | -0.0191        | 0.2489         |
| mmu-miR-100-5p    | -0.3275        | -0.0478        | -0.0538        | 0.1864         |
| mmu-miR-101a-3p   | 0.1778         | -0.1979        | 0.0572         | 0.2314         |
| mmu-miR-103-1-5p  | 0.0148         | 0.5466         | -0.6091        | -0.5907        |
| mmu-miR-106a-5p   | 0.2778         | -0.2861        | -0.1515        | 0.0860         |
| mmu-miR-107-5p    | -0.2116        | 0.2117         | -0.2934        | -0.2340        |
| mmu-miR-10a-3p    | 0.0795         | -0.6833        | 0.2748         | 0.8767         |
| mmu-miR-10a-5p    | 0.5676         | -0.2092        | -0.5408        | 0.3855         |
| mmu-miR-10b-5p    | -0.7342        | -0.0330        | -0.1343        | -1.3967        |
| mmu-miR-1187      | 0.2046         | 0.3075         | -0.2942        | -0.6506        |
| mmu-miR-1191b-5p  | -0.0074        | -0.4625        | -0.0639        | 0.0316         |
| mmu-miR-1197-3p   | -0.2541        | -0.2638        | 0.6320         | 0.4078         |
| mmu-miR-1199-5p   | 0.5890         | 0.1404         | -0.0226        | -0.0911        |
| mmu-miR-122-3p    | 0.0723         | -0.1780        | -0.2021        | -0.6006        |
| mmu-miR-1224-3p   | -0.0634        | 0.2055         | 0.2121         | -0.3310        |
| mmu-miR-1224-5p   | 0.3593         | 0.2218         | 0.0767         | -0.3360        |
| mmu-miR-1231-5p   | -0.0052        | 0.2850         | -0.0944        | -0.5358        |
| mmu-miR-1249-3p   | -0.3279        | -0.2093        | 0.1424         | 0.4612         |
| mmu-miR-1249-5p   | 0.2123         | -0.3522        | -0.6610        | 0.5722         |
| mmu-miR-128-2-5p  | 0.0723         | 0.1066         | 0.1208         | -0.2727        |
| mmu-miR-128-3p    | -0.3584        | -0.0597        | -0.0744        | -0.3459        |
| mmu-miR-1291      | -0.4635        | -0.2166        | 0.6273         | 0.4204         |
| mmu-miR-129-5p    | 0.1116         | -0.0810        | 0.1401         | 0.3231         |
| mmu-miR-1306-3p   | 0.2549         | 0.2474         | -0.1761        | -0.5257        |
| mmu-miR-132-5p    | -0.0470        | 0.1010         | -0.2922        | -0.5597        |
| mmu-miR-133b-3p   | -0.8606        | -0.9002        | 0.2125         | 0.6030         |
| mmu-miR-134-5p    | 0.2573         | 0.0127         | 0.0670         | 0.1565         |
| mmu-miR-135a-1-3p | -0.0046        | 0.2759         | 0.4568         | -0.1297        |
| mmu-miR-135a-2-3p | 0.1873         | 0.3295         | 0.1255         | -0.3168        |
| mmu-miR-135b-3p   | 0.3857         | 0.0396         | 0.3557         | -0.2469        |
| mmu-miR-141-3p    | -0.3585        | 0.8991         | -0.6958        | -2.6923        |
| mmu-miR-142-3p    | 0.5746         | -0.2458        | -0.7970        | 0.2479         |
| mmu-miR-142-5p    | 0.5108         | -0.3600        | -0.5555        | 0.5197         |
| mmu-miR-144-3p    | 0.3584         | 0.1964         | -0.3689        | -0.6133        |
| mmu-miR-144-5p    | 0.1886         | 0.1095         | -0.1963        | -0.4657        |
| mmu-miR-146a-5p   | 0.2581         | -0.2284        | -0.6367        | 0.4467         |
| mmu-miR-147-3p    | 1.0018         | -0.1942        | -0.9023        | 0.0455         |
| mmu-miR-148a-5p   | 0.3960         | -0.0038        | -0.1823        | -0.0266        |
| mmu-miR-150-5p    | -0.4175        | -0.0706        | 0.0534         | 0.2060         |
| mmu-miR-153-5p    | 0.0462         | 0.1762         | -0.5236        | 0.0239         |
| mmu-miR-155-5p    | 0.7418         | -0.2485        | -0.9403        | 0.5972         |
| mmu-miR-15a-3p    | 0.0811         | -0.0308        | -0.3618        | 0.0982         |
| mmu-miR-16-5p     | -0.3267        | -0.1065        | -0.0485        | -0.0789        |
| mmu-miR-17-3p     | 0.4731         | 0.0582         | -0.1878        | -0.0902        |
| mmu-miR-181b-1-3p | -0.8942        | -0.3846        | 0.4342         | 0.6218         |
| mmu-miR-181d-3p   | 0.3377         | 0.0281         | -0.4452        | -0.1357        |
| mmu-miR-181d-5p   | 0.3516         | 0.2080         | 0.0245         | -0.3009        |
| mmu-miR-182-5p    | -0.5238        | 0.9668         | -0.6348        | -2.7409        |
| mmu-miR-183-3p    | -0.3198        | 0.6796         | -0.2632        | -2.6654        |
| mmu-miR-183-5p    | -0.4315        | 0.9706         | -0.7337        | -2.7691        |
| mmu-miR-1843b-3p  | -0.4998        | -0.4002        | 0.7064         | 0.2939         |
| mmu-miR-184-3p    | -0.3046        | -0.0812        | -0.1536        | -0.3587        |
| mmu-miR-187-5p    | 0.1196         | 0.0209         | 0.1037         | 0.2951         |
| mmu-miR-188-3p    | -0.2123        | -0.0081        | -0.2574        | -0.0053        |
| mmu-miR-18a-3p    | 0.5164         | 0.0831         | -0.0568        | -0.2167        |
| mmu-miR-18a-5p    | 0.3949         | 0.0466         | -0.2285        | 0.0052         |
| mmu-miR-190a-3p   | -0.4128        | -0.3115        | 0.0561         | 0.3101         |

|                  |         |         |         |         |
|------------------|---------|---------|---------|---------|
| mmu-miR-190b-3p  | -0.2260 | -0.0433 | 0.2637  | 0.6857  |
| mmu-miR-1912-3p  | -0.5707 | -0.3056 | 0.5282  | 0.6060  |
| mmu-miR-1930-5p  | -0.4576 | 0.1378  | -0.0713 | 0.1214  |
| mmu-miR-1934-3p  | 0.5751  | -0.1570 | 0.2762  | 0.0747  |
| mmu-miR-1934-5p  | 0.3563  | -0.4591 | -0.0930 | 0.3922  |
| mmu-miR-193a-3p  | 0.3536  | -0.0502 | 0.0239  | 0.2705  |
| mmu-miR-193b-3p  | -0.1808 | -0.2056 | -0.0672 | 0.3777  |
| mmu-miR-1941-3p  | -0.4052 | -0.4309 | 0.2264  | 0.6727  |
| mmu-miR-1941-5p  | 0.0049  | -0.0026 | -0.5110 | -0.6689 |
| mmu-miR-1943-3p  | 0.0482  | -0.2333 | -0.1734 | 0.4767  |
| mmu-miR-1945     | 0.8309  | 0.0253  | -0.1553 | -0.2687 |
| mmu-miR-1947-5p  | 0.3935  | 0.0335  | -0.0923 | -0.4548 |
| mmu-miR-1955-3p  | -0.0774 | 0.2166  | -0.6293 | -1.2089 |
| mmu-miR-1957a    | 0.2649  | 0.0039  | -0.2292 | -0.4461 |
| mmu-miR-195a-3p  | 0.1773  | 0.0019  | -0.0017 | -0.4718 |
| mmu-miR-195a-5p  | -0.2103 | 0.0165  | 0.0469  | -0.2838 |
| mmu-miR-1964-5p  | 0.3956  | -0.1673 | -0.6428 | -0.1390 |
| mmu-miR-1966-3p  | -0.4001 | 0.2161  | 0.2900  | 0.0441  |
| mmu-miR-1968-5p  | 0.5419  | 0.3154  | 0.0990  | -0.1101 |
| mmu-miR-1981-5p  | 0.2685  | 0.1318  | 0.0271  | -0.3791 |
| mmu-miR-1982-3p  | -0.3503 | 0.1906  | 0.0538  | 0.1562  |
| mmu-miR-199a-5p  | -0.1610 | 0.1769  | -0.2671 | -0.4742 |
| mmu-miR-19a-3p   | 0.3636  | -0.0697 | -0.1622 | 0.1558  |
| mmu-miR-200a-3p  | -0.4684 | 0.9169  | -0.6757 | -2.5999 |
| mmu-miR-200a-5p  | -0.5220 | 0.9272  | -0.5856 | -2.3648 |
| mmu-miR-200b-3p  | -0.6398 | 0.9143  | -0.7255 | -2.6524 |
| mmu-miR-200b-5p  | -0.3009 | 0.9174  | -0.7069 | -2.4654 |
| mmu-miR-200c-3p  | -0.5805 | 0.9058  | -0.6837 | -2.6914 |
| mmu-miR-201-5p   | 0.2910  | 0.0815  | -0.4323 | -0.2017 |
| mmu-miR-202-5p   | -0.0075 | 0.0071  | -0.3177 | 0.5877  |
| mmu-miR-203-3p   | 0.6630  | 0.1195  | -0.5161 | -0.0840 |
| mmu-miR-203-5p   | 0.4712  | 0.2890  | -0.8732 | -0.1725 |
| mmu-miR-204-3p   | 0.4383  | 0.0321  | 0.0848  | 0.1239  |
| mmu-miR-205-5p   | -0.1281 | 0.3503  | -0.5141 | -1.0658 |
| mmu-miR-206-3p   | -0.6339 | -0.3510 | -0.3112 | -0.1299 |
| mmu-miR-208b-3p  | 0.4342  | -0.0860 | 0.3226  | 0.2809  |
| mmu-miR-20b-5p   | 0.3801  | 0.0915  | -0.4894 | 0.0384  |
| mmu-miR-210-5p   | -0.2501 | -0.6692 | 0.2309  | 0.2097  |
| mmu-miR-2137     | 0.5059  | -0.4024 | -0.3284 | -0.7719 |
| mmu-miR-214-3p   | 1.0021  | 0.6875  | -0.9687 | -1.8572 |
| mmu-miR-214-5p   | -0.0651 | 0.6142  | -0.6386 | -1.2687 |
| mmu-miR-215-5p   | 0.1073  | -0.2342 | -0.1299 | 0.2796  |
| mmu-miR-216a-5p  | 0.5502  | 0.0687  | 0.2298  | 0.1979  |
| mmu-miR-216b-5p  | 0.8262  | 0.6546  | -0.1558 | -0.4256 |
| mmu-miR-217-5p   | 0.4384  | 0.3914  | -0.5089 | -0.3623 |
| mmu-miR-219a-5p  | -0.0466 | -0.2305 | -0.2283 | 0.2536  |
| mmu-miR-21a-3p   | 0.6084  | -0.1010 | -0.3597 | 0.5811  |
| mmu-miR-21a-5p   | 0.5635  | -0.1732 | -0.4020 | 0.2305  |
| mmu-miR-21b      | 0.0624  | -0.1320 | -0.4046 | 0.4290  |
| mmu-miR-21c      | 0.3660  | -0.1974 | -0.2830 | 0.2403  |
| mmu-miR-223-5p   | 0.4631  | 0.1276  | -0.4899 | -0.3855 |
| mmu-miR-224-5p   | 0.1383  | 0.5350  | -0.3944 | -0.9717 |
| mmu-miR-22-5p    | -0.2436 | -0.0776 | -0.1432 | -0.1050 |
| mmu-miR-23a-5p   | 0.2439  | 0.2048  | -0.4728 | -0.1270 |
| mmu-miR-24-1-5p  | -0.1299 | -0.2071 | -0.2366 | 0.0886  |
| mmu-miR-25-5p    | -0.4295 | 0.0019  | -0.1852 | -0.0555 |
| mmu-miR-26a-1-3p | -0.4740 | 0.0080  | -0.2580 | 0.0187  |
| mmu-miR-26b-3p   | -0.5646 | 0.0221  | 0.0223  | 0.1493  |
| mmu-miR-2861     | 0.1396  | 0.3508  | -0.1795 | 0.1162  |
| mmu-miR-28a-3p   | 0.4725  | 0.1726  | -0.0100 | -0.1709 |
| mmu-miR-295-5p   | -0.0317 | 0.0029  | -0.5473 | -0.1483 |
| mmu-miR-296-5p   | 0.2657  | 0.0589  | -0.1207 | 0.1740  |
| mmu-miR-297c-5p  | 0.2847  | -0.1333 | -0.1553 | 0.1579  |
| mmu-miR-298-3p   | 0.6213  | 0.3624  | -0.1868 | 0.0555  |

|                   |         |         |         |         |
|-------------------|---------|---------|---------|---------|
| mmu-miR-29b-1-5p  | -0.3416 | 0.1104  | 0.0902  | 0.1134  |
| mmu-miR-29b-3p    | 0.2300  | -0.1148 | 0.1516  | 0.1722  |
| mmu-miR-302b-3p   | 0.1491  | 0.1066  | -0.5272 | -0.8275 |
| mmu-miR-302d-3p   | -0.4478 | -0.1545 | -0.1232 | -0.5573 |
| mmu-miR-3057-3p   | 0.1706  | 0.4010  | 0.1771  | -0.2873 |
| mmu-miR-3059-3p   | 0.1276  | 0.1694  | 0.2826  | -0.2444 |
| mmu-miR-3066-3p   | -0.3378 | -0.6319 | 0.2039  | 0.5352  |
| mmu-miR-3067-3p   | -0.0349 | -0.0575 | -0.3555 | -0.9225 |
| mmu-miR-3069-3p   | -0.0865 | -0.3204 | -0.2281 | 0.5624  |
| mmu-miR-3072-3p   | 0.1296  | -0.3621 | 0.1346  | 0.4056  |
| mmu-miR-3072-5p   | 0.0758  | -0.2502 | -0.0827 | 0.7860  |
| mmu-miR-3074-5p   | 0.2729  | 0.0074  | 0.1725  | 0.2649  |
| mmu-miR-3078-5p   | -0.1634 | -0.2155 | 0.4210  | 0.6205  |
| mmu-miR-3080-5p   | -0.0216 | 0.0292  | 0.5050  | 0.1492  |
| mmu-miR-3085-3p   | -0.4038 | -0.0675 | 0.2829  | -0.3055 |
| mmu-miR-3085-5p   | 0.4502  | 0.1169  | -0.0625 | -1.2465 |
| mmu-miR-3088-3p   | -0.1256 | 0.1946  | 0.1866  | 0.8133  |
| mmu-miR-3094-3p   | 0.0095  | -0.0348 | 0.3092  | -0.1068 |
| mmu-miR-3097-5p   | -0.4688 | -0.0836 | 0.1787  | -0.1876 |
| mmu-miR-3098-3p   | -0.3700 | 0.0994  | -0.2178 | -0.4691 |
| mmu-miR-3098-5p   | 0.1571  | -0.1228 | -0.4347 | -0.1201 |
| mmu-miR-3099-3p   | 0.4789  | 0.2845  | -0.0735 | -0.1925 |
| mmu-miR-3100-3p   | -0.0300 | 0.4507  | -0.1365 | -0.1699 |
| mmu-miR-3103-5p   | 0.4513  | -0.1230 | 0.4544  | -0.0392 |
| mmu-miR-3110-5p   | -0.3785 | -0.6384 | 0.6849  | 0.4023  |
| mmu-miR-31-3p     | -0.5092 | -0.2527 | 0.1584  | 0.2733  |
| mmu-miR-32-3p     | -0.3090 | 0.1686  | -0.5113 | -0.4703 |
| mmu-miR-326-5p    | 0.6873  | -0.2033 | 0.1840  | 0.0960  |
| mmu-miR-329-3p    | -0.4676 | -0.0300 | -0.0750 | 0.0012  |
| mmu-miR-340-3p    | -0.0385 | 0.0988  | -0.1520 | -0.4448 |
| mmu-miR-340-5p    | -0.0055 | 0.0212  | -0.1032 | -0.5298 |
| mmu-miR-341-5p    | 0.4536  | -0.1196 | -0.0975 | 0.3492  |
| mmu-miR-342-5p    | 0.2232  | 0.1629  | -0.1509 | -0.3983 |
| mmu-miR-344-3p    | 0.3450  | 0.0310  | 0.0817  | 0.1622  |
| mmu-miR-344-5p    | 0.2168  | 0.1501  | 0.1188  | 0.3909  |
| mmu-miR-344b-3p   | 0.1063  | -0.1944 | 0.2059  | 0.3970  |
| mmu-miR-344d-1-5p | -0.4460 | -0.2206 | 0.0450  | 0.2902  |
| mmu-miR-344f-3p   | 0.5799  | 0.0906  | 0.0942  | -0.1534 |
| mmu-miR-344f-5p   | 0.7428  | 0.1045  | 0.0864  | 0.0343  |
| mmu-miR-344g-3p   | 0.2177  | -0.1706 | 0.1366  | 0.1057  |
| mmu-miR-344g-5p   | 0.4649  | 0.1216  | -0.0895 | 0.1766  |
| mmu-miR-344h-3p   | 0.4708  | 0.1320  | -0.1397 | -0.4353 |
| mmu-miR-345-3p    | 0.2547  | 0.0724  | 0.1191  | -0.2265 |
| mmu-miR-3470a     | 0.5462  | 0.3755  | -0.5070 | -0.0773 |
| mmu-miR-3472      | 0.1766  | -0.1225 | -0.5047 | -0.3458 |
| mmu-miR-3473a     | -0.1256 | -0.0027 | -0.0753 | -0.2834 |
| mmu-miR-3473g     | 0.5107  | -0.0943 | 0.3611  | 0.1086  |
| mmu-miR-3475-3p   | 0.0040  | 0.3110  | -0.0349 | -0.4449 |
| mmu-miR-34b-3p    | -0.2954 | -0.1415 | -0.1300 | 0.4958  |
| mmu-miR-34b-5p    | -0.0884 | -0.1657 | -0.0529 | 0.4689  |
| mmu-miR-34c-3p    | -0.1885 | -0.2358 | -0.4197 | 0.4270  |
| mmu-miR-34c-5p    | -0.2108 | -0.1745 | 0.0534  | 0.4570  |
| mmu-miR-350-5p    | 0.3767  | -0.0138 | -0.0380 | -0.0382 |
| mmu-miR-3544-5p   | 0.1652  | 0.5352  | -0.1864 | 0.2261  |
| mmu-miR-3547-3p   | 0.4743  | 0.3118  | -0.0153 | 0.2377  |
| mmu-miR-3572-3p   | -0.3874 | 0.0828  | -0.3379 | -0.2785 |
| mmu-miR-363-3p    | 0.3572  | 0.2010  | -0.3466 | 0.1593  |
| mmu-miR-363-5p    | -0.1386 | 0.2636  | -0.5893 | -0.1077 |
| mmu-miR-365-3p    | -0.2430 | -0.1515 | 0.1429  | 0.3799  |
| mmu-miR-375-3p    | 0.0428  | 0.1140  | -0.4673 | -1.5865 |
| mmu-miR-376c-5p   | 0.5187  | -0.1527 | -0.1831 | -0.0065 |
| mmu-miR-378b      | 0.3749  | -0.2122 | -0.0223 | 0.1051  |
| mmu-miR-378c      | -0.6994 | 0.1735  | -0.1212 | 0.3129  |
| mmu-miR-378d      | 0.0516  | -0.7212 | 0.2714  | 0.7370  |

|                 |         |         |         |         |
|-----------------|---------|---------|---------|---------|
| mmu-miR-382-3p  | 0.1887  | 0.0281  | -0.0062 | 0.3627  |
| mmu-miR-383-3p  | -0.2382 | -0.2456 | 0.0862  | 0.4360  |
| mmu-miR-411-3p  | -0.2170 | -0.0939 | -0.1557 | -0.2419 |
| mmu-miR-412-3p  | 0.2447  | 0.5043  | -0.1852 | 0.4511  |
| mmu-miR-429-3p  | -0.7180 | 0.9097  | -0.6697 | -2.5966 |
| mmu-miR-431-3p  | 0.2263  | -0.0270 | 0.0355  | 0.2217  |
| mmu-miR-434-3p  | -0.6021 | -0.1964 | 0.2981  | 0.3522  |
| mmu-miR-448-3p  | -0.2039 | -0.2946 | 0.4359  | 0.4129  |
| mmu-miR-449a-5p | -0.5739 | -0.2491 | 0.0158  | 0.1697  |
| mmu-miR-449b    | -0.8176 | -0.5608 | 0.6143  | 1.1160  |
| mmu-miR-449c-5p | -0.9139 | -0.4546 | 0.0145  | 0.2692  |
| mmu-miR-450b-3p | -0.8065 | 0.0052  | 0.2154  | 0.0385  |
| mmu-miR-451a    | -0.0494 | 0.1271  | -0.3469 | -0.4997 |
| mmu-miR-465b-5p | 0.0670  | -0.0561 | -0.4765 | 0.0463  |
| mmu-miR-465d-3p | -0.4444 | -0.1011 | -0.1167 | 0.1885  |
| mmu-miR-466h-3p | -0.2197 | 0.2022  | -0.2685 | -0.5440 |
| mmu-miR-466i-3p | -0.6267 | 0.1616  | 0.0726  | -0.0799 |
| mmu-miR-466i-5p | -0.0565 | 0.1631  | -0.3672 | -0.6466 |
| mmu-miR-466n-5p | 0.3467  | -0.3279 | 0.0373  | 0.2274  |
| mmu-miR-467a-3p | -0.2152 | 0.1639  | -0.6299 | 0.0229  |
| mmu-miR-467b-5p | -0.3397 | 0.0549  | -0.0305 | -0.1516 |
| mmu-miR-467c-3p | -0.5207 | -0.2536 | 0.0021  | -0.0974 |
| mmu-miR-467e-3p | -0.3185 | 0.1668  | -0.1831 | -0.4926 |
| mmu-miR-467g    | -0.1370 | -0.2748 | -0.2794 | -0.1255 |
| mmu-miR-483-5p  | 0.1256  | 0.5911  | -0.1743 | -0.6532 |
| mmu-miR-486-3p  | 0.0150  | 0.1187  | 0.2811  | -0.2718 |
| mmu-miR-487b-5p | 0.5284  | 0.6181  | -0.7065 | -0.4296 |
| mmu-miR-494-3p  | -0.3537 | 0.0139  | 0.0143  | -0.1249 |
| mmu-miR-495-3p  | -0.0434 | 0.0532  | -0.2103 | -0.4202 |
| mmu-miR-496a-5p | 0.1555  | 0.0601  | -0.4943 | -0.2057 |
| mmu-miR-497-3p  | 0.2915  | -0.1452 | -0.2082 | -0.5391 |
| mmu-miR-503-3p  | -0.4814 | -0.1467 | 0.3465  | 0.3584  |
| mmu-miR-5099    | 0.4439  | -0.0036 | -0.1922 | -0.2576 |
| mmu-miR-5103    | -0.0049 | -0.2369 | -0.3524 | -0.5635 |
| mmu-miR-5106    | -0.6349 | -0.4659 | -0.3054 | -0.4686 |
| mmu-miR-5107-3p | 0.4780  | -0.1973 | -0.5977 | 0.4554  |
| mmu-miR-5113    | -0.3828 | -0.1789 | -0.1159 | -0.3074 |
| mmu-miR-5114    | 0.9759  | -0.1966 | -1.0506 | -0.0298 |
| mmu-miR-5119    | -0.0820 | -0.5551 | -0.2377 | -0.0584 |
| mmu-miR-5124a   | -0.0824 | -0.7079 | 0.8209  | 0.5407  |
| mmu-miR-5126    | 0.8248  | -0.1446 | -0.7350 | -0.0395 |
| mmu-miR-5129-3p | -0.4759 | -0.0272 | 0.1047  | -0.4269 |
| mmu-miR-5130    | -0.0331 | 0.2648  | -0.4780 | -0.1459 |
| mmu-miR-5134-5p | -0.4658 | -0.1377 | 0.1742  | -0.5186 |
| mmu-miR-539-5p  | 0.0633  | 0.1982  | -0.2221 | -0.4774 |
| mmu-miR-540-5p  | 0.2418  | -0.0821 | -0.0083 | 0.2939  |
| mmu-miR-547-3p  | 0.3865  | 0.0865  | -0.3704 | 0.0694  |
| mmu-miR-551b-5p | 0.1724  | 0.0358  | -0.2509 | -0.5341 |
| mmu-miR-5617-3p | -0.4963 | -0.4740 | 0.6475  | 0.4695  |
| mmu-miR-5621-3p | -0.4354 | -0.3713 | 0.4958  | 0.5049  |
| mmu-miR-5624-3p | -0.3813 | 0.1947  | -0.0427 | -0.0125 |
| mmu-miR-5626-3p | 0.6398  | 0.4594  | -0.4640 | -0.7949 |
| mmu-miR-5627-3p | 0.3377  | -0.1733 | 0.1821  | 0.6013  |
| mmu-miR-5709-5p | -0.3498 | -0.6564 | -0.0163 | 0.0844  |
| mmu-miR-5710    | -1.0606 | -0.3703 | 0.4412  | -0.0252 |
| mmu-miR-574-5p  | -0.0348 | -0.0054 | -0.1327 | -0.4686 |
| mmu-miR-582-3p  | 0.4420  | 0.1004  | 0.0208  | 0.0026  |
| mmu-miR-592-3p  | -0.6279 | -0.2318 | -0.1267 | -0.2782 |
| mmu-miR-592-5p  | -0.2741 | -0.0648 | 0.2002  | -0.3240 |
| mmu-miR-598-5p  | 0.3396  | -0.1939 | -0.3541 | -0.4583 |
| mmu-miR-6236    | 0.4275  | 0.3190  | -0.3294 | -0.7513 |
| mmu-miR-6238    | 0.7544  | 0.2971  | -0.9133 | -2.2192 |
| mmu-miR-6240    | 0.4932  | 0.1580  | -0.8509 | -1.2995 |
| mmu-miR-6369    | -0.0537 | -0.1478 | -0.3645 | 0.0004  |

|                   |         |         |         |         |
|-------------------|---------|---------|---------|---------|
| mmu-miR-6392-5p   | -0.6094 | -0.1515 | 0.5890  | -0.0490 |
| mmu-miR-6418-3p   | -0.3536 | 0.0673  | -0.1301 | 0.1725  |
| mmu-miR-652-5p    | -0.0490 | -0.4919 | 0.2975  | 0.4316  |
| mmu-miR-653-3p    | 0.7046  | 0.4501  | -0.1149 | -0.1896 |
| mmu-miR-6538      | 0.4406  | 0.5509  | -0.1937 | 0.5467  |
| mmu-miR-664-3p    | -0.4707 | -0.1105 | 0.2425  | 0.2638  |
| mmu-miR-665-5p    | -0.4848 | -0.1365 | -0.1441 | -0.0152 |
| mmu-miR-667-3p    | -0.1864 | 0.0315  | 0.1787  | 0.4591  |
| mmu-miR-669a-3-3p | -0.0874 | 0.3274  | -0.5035 | -0.1828 |
| mmu-miR-669b-3p   | -0.3749 | -0.7177 | 0.5418  | -0.3274 |
| mmu-miR-669c-3p   | 0.4613  | 0.2493  | -0.0936 | 0.1192  |
| mmu-miR-669c-5p   | 0.0647  | 0.1950  | -0.0195 | -0.4446 |
| mmu-miR-669e-3p   | -0.0492 | 0.3511  | -0.5959 | -0.9763 |
| mmu-miR-669h-3p   | 0.4736  | 0.0714  | -0.3567 | -0.8330 |
| mmu-miR-669h-5p   | 0.1426  | 0.2182  | 0.0670  | -0.3947 |
| mmu-miR-669i      | 0.3018  | 0.0319  | -0.3531 | 0.4256  |
| mmu-miR-669k-5p   | 0.1465  | 0.4170  | -0.2154 | -0.6538 |
| mmu-miR-669o-5p   | -0.3550 | 0.1185  | -0.3084 | -0.3804 |
| mmu-miR-670-3p    | 0.5124  | 0.1887  | -0.1626 | -0.0345 |
| mmu-miR-672-3p    | -0.3458 | 0.1613  | -0.0901 | 0.0725  |
| mmu-miR-6769b-3p  | 0.0072  | -0.3780 | 0.2162  | 0.4365  |
| mmu-miR-679-3p    | 0.0470  | 0.1202  | -0.0668 | 0.3759  |
| mmu-miR-679-5p    | -0.0514 | 0.2146  | 0.3486  | 0.0680  |
| mmu-miR-686       | -0.2603 | -0.4103 | 0.2491  | 0.3740  |
| mmu-miR-6896-5p   | -0.0122 | -0.4847 | 0.2874  | 0.2577  |
| mmu-miR-6897-3p   | 0.6918  | 0.3462  | -0.1034 | -0.8114 |
| mmu-miR-6899-3p   | 0.3067  | 0.0059  | 0.0445  | -0.3286 |
| mmu-miR-6901-3p   | -0.6193 | 0.1100  | 0.1130  | 0.0411  |
| mmu-miR-6902-5p   | -0.2322 | -0.6615 | 0.0102  | -0.0143 |
| mmu-miR-6903-3p   | -0.5569 | 0.2555  | 0.0387  | -0.1480 |
| mmu-miR-6903-5p   | 0.6115  | 0.3398  | -0.2119 | -0.3605 |
| mmu-miR-6906-5p   | 0.8159  | 0.1450  | 0.1331  | -0.4591 |
| mmu-miR-6908-3p   | -0.4599 | -0.3486 | 0.4320  | 0.6330  |
| mmu-miR-6913-3p   | -0.5051 | 0.0398  | -0.1909 | -0.0768 |
| mmu-miR-6915-3p   | -0.6299 | 0.3932  | 0.2219  | 0.3706  |
| mmu-miR-6915-5p   | -0.3808 | 0.2121  | -0.2469 | 0.3894  |
| mmu-miR-6917-3p   | -0.3566 | -0.4883 | -0.1948 | 0.0758  |
| mmu-miR-6918-5p   | 0.1900  | 0.0292  | 0.3994  | -0.1425 |
| mmu-miR-6920-5p   | 0.5101  | -0.1974 | 0.3216  | 0.1976  |
| mmu-miR-6921-3p   | -0.0618 | -0.1021 | 0.4501  | 0.1413  |
| mmu-miR-6922-3p   | 0.6819  | 0.1740  | -0.2611 | -0.2758 |
| mmu-miR-6926-3p   | -0.2087 | 0.3810  | -0.1078 | -0.1143 |
| mmu-miR-6929-3p   | -0.4770 | -0.2218 | -0.0270 | -0.1815 |
| mmu-miR-6930-3p   | NA      | 0.3873  | -0.3294 | NA      |
| mmu-miR-6931-3p   | -0.2326 | 0.1500  | 0.0783  | 0.5567  |
| mmu-miR-6933-5p   | 0.0855  | -0.0795 | -0.4743 | -0.4116 |
| mmu-miR-6934-5p   | 0.5866  | 0.2881  | -0.3874 | -0.0711 |
| mmu-miR-693-5p    | 0.4372  | -0.0578 | -0.2372 | 0.0352  |
| mmu-miR-6937-5p   | -0.0787 | 0.1969  | -0.3726 | -0.5576 |
| mmu-miR-6940-3p   | 0.2626  | -0.2769 | -0.1194 | -0.2344 |
| mmu-miR-6941-3p   | 0.0055  | -0.2803 | 0.0972  | -0.3573 |
| mmu-miR-6943-3p   | -0.4332 | 0.1991  | 0.3140  | 0.5771  |
| mmu-miR-6948-3p   | -0.0450 | -0.0290 | -0.2063 | -0.4125 |
| mmu-miR-6948-5p   | -0.1711 | -0.2050 | 0.1238  | -0.1983 |
| mmu-miR-6952-5p   | 0.1982  | 0.0959  | 0.0085  | -0.7237 |
| mmu-miR-6953-3p   | -0.1062 | 0.3240  | -0.0098 | 0.1890  |
| mmu-miR-6955-5p   | 0.3824  | 0.6336  | -0.2918 | -0.4660 |
| mmu-miR-6957-3p   | -0.0300 | -0.0501 | -0.3076 | 0.0655  |
| mmu-miR-6959-3p   | -0.7106 | -0.0263 | -0.3181 | 0.1570  |
| mmu-miR-6959-5p   | 0.3012  | 0.4154  | -0.0522 | -0.1876 |
| mmu-miR-6965-3p   | -0.1672 | -0.0055 | -0.3624 | -0.9101 |
| mmu-miR-6966-3p   | -0.1499 | 0.0588  | -0.0455 | -0.6053 |
| mmu-miR-6967-3p   | -0.2161 | 0.6529  | -0.4699 | -0.4265 |
| mmu-miR-6970-3p   | -0.2741 | -0.3995 | 0.1254  | -0.3374 |



|                 |         |         |         |         |
|-----------------|---------|---------|---------|---------|
| mmu-miR-6971-3p | 0.1823  | 0.1297  | -0.3484 | 0.1200  |
| mmu-miR-6971-5p | 0.3311  | 0.0723  | -0.1463 | 0.2000  |
| mmu-miR-6975-3p | -0.5329 | 0.2309  | -0.0545 | 0.1514  |
| mmu-miR-6977-3p | -0.1658 | 0.3004  | 0.1592  | 0.0548  |
| mmu-miR-6982-3p | -0.2842 | -0.0866 | 0.1643  | 0.8127  |
| mmu-miR-6983-3p | 0.5410  | -0.4949 | -0.3406 | -0.1202 |
| mmu-miR-698-3p  | 0.6226  | 0.5355  | -0.2159 | -0.1999 |
| mmu-miR-6984-3p | 0.2063  | 0.2308  | -0.4954 | -0.1027 |
| mmu-miR-6989-3p | -0.2480 | 0.1253  | 0.0402  | -0.2138 |
| mmu-miR-6990-3p | -0.0234 | -0.0208 | 0.5986  | 0.3124  |
| mmu-miR-6990-5p | 0.2720  | 0.0451  | -0.2724 | 0.4360  |
| mmu-miR-6994-3p | 0.7007  | 0.1503  | -0.4821 | -0.6931 |
| mmu-miR-6996-3p | -0.0303 | -0.4116 | -0.0449 | 0.3798  |
| mmu-miR-6996-5p | -0.1317 | -0.1093 | -0.2408 | 0.4258  |
| mmu-miR-6999-5p | -0.1360 | 0.5416  | 0.0657  | 0.1115  |
| mmu-miR-7000-5p | 0.2977  | 0.0176  | 0.1029  | 0.3814  |
| mmu-miR-7002-3p | -0.4599 | -0.6594 | 0.6365  | 0.3693  |
| mmu-miR-7004-3p | -0.1188 | 0.0135  | -0.4901 | 0.2673  |
| mmu-miR-7006-3p | -0.1850 | 0.0334  | 0.1697  | 0.5940  |
| mmu-miR-7008-5p | 0.0231  | 0.2156  | 0.3031  | -0.6177 |
| mmu-miR-7010-5p | 0.3797  | 0.3366  | 0.1819  | -0.4834 |
| mmu-miR-7012-3p | 0.4637  | 0.1113  | 0.1363  | -0.0076 |
| mmu-miR-7013-3p | 0.4013  | 0.4324  | -0.1607 | -0.5196 |
| mmu-miR-7013-5p | 0.4256  | 0.3390  | -0.2017 | -0.4704 |
| mmu-miR-7015-3p | -0.1714 | -0.1601 | 0.0920  | 0.4295  |
| mmu-miR-701-5p  | 0.3502  | 0.0251  | 0.0227  | -0.0645 |
| mmu-miR-7016-5p | 0.9296  | 0.6015  | -0.2034 | -0.5258 |
| mmu-miR-7019-3p | -0.3789 | 0.1802  | 0.4137  | 0.1683  |
| mmu-miR-7019-5p | 0.3132  | 0.4055  | -0.3977 | -0.7061 |
| mmu-miR-7020-5p | -0.1727 | 0.2509  | -0.6254 | -0.2789 |
| mmu-miR-7021-5p | 0.5216  | 0.2095  | 0.2681  | -0.5195 |
| mmu-miR-7023-3p | 0.3122  | 0.2263  | -0.2392 | 0.1558  |
| mmu-miR-7024-3p | -0.4345 | 0.0138  | 0.1877  | 0.4880  |
| mmu-miR-7027-3p | -0.3884 | 0.0309  | 0.3957  | -0.0289 |
| mmu-miR-7029-3p | -0.4150 | 0.2272  | -0.3890 | -0.4660 |
| mmu-miR-7030-3p | 0.8567  | 0.3233  | -0.1585 | -0.4018 |
| mmu-miR-7033-5p | 0.2932  | 0.2014  | -0.1783 | -0.4619 |
| mmu-miR-7036-3p | -0.1249 | -0.4813 | 0.3254  | 0.4853  |
| mmu-miR-7038-3p | -0.1820 | -0.4675 | 0.2060  | -0.6906 |
| mmu-miR-7038-5p | 0.7889  | 0.4509  | -0.0930 | -0.2927 |
| mmu-miR-7041-5p | -0.2519 | -0.2301 | -0.3518 | -0.2128 |
| mmu-miR-7042-3p | -0.1953 | -0.2572 | 0.5662  | 0.5705  |
| mmu-miR-7043-3p | 0.3375  | 0.2536  | -0.6017 | -0.9640 |
| mmu-miR-7044-3p | -0.1257 | 0.1756  | 0.0957  | 0.2813  |
| mmu-miR-7044-5p | -0.1020 | -0.3897 | -0.4446 | -0.4238 |
| mmu-miR-7052-3p | -0.2436 | 0.0600  | 0.5602  | 0.2579  |
| mmu-miR-7052-5p | -0.6258 | -0.0989 | 0.3926  | -0.1113 |
| mmu-miR-7055-3p | -0.1763 | -0.4289 | -0.0880 | -0.1420 |
| mmu-miR-7055-5p | -0.0739 | -0.0547 | -0.2007 | -0.5127 |
| mmu-miR-7056-3p | -0.2123 | -0.0215 | -0.4628 | 0.3868  |
| mmu-miR-7056-5p | 0.5294  | 0.4408  | -0.4565 | -0.3521 |
| mmu-miR-7059-5p | 0.1301  | -0.0349 | 0.3294  | -0.4198 |
| mmu-miR-7061-5p | 0.1567  | 0.4830  | -0.3155 | -0.9124 |
| mmu-miR-7063-3p | -0.6331 | 0.1000  | 0.1324  | -0.0168 |
| mmu-miR-7063-5p | -0.2832 | 0.1766  | 0.0221  | -0.3192 |
| mmu-miR-7065-3p | 0.2488  | 0.0096  | -0.1425 | 0.1521  |
| mmu-miR-7066-3p | 0.1522  | 0.4941  | 0.0358  | 0.2195  |
| mmu-miR-7066-5p | 0.9412  | 0.4609  | -0.4578 | -0.6362 |
| mmu-miR-7067-3p | -0.6232 | -0.1752 | 0.4065  | 0.4544  |
| mmu-miR-7068-3p | 0.3443  | 0.1598  | 0.1204  | -0.3012 |
| mmu-miR-7068-5p | -0.8278 | -0.3389 | 0.1316  | -0.1966 |
| mmu-miR-7069-3p | -0.6409 | -0.0414 | 0.4159  | 0.1999  |
| mmu-miR-7073-5p | 0.1870  | 0.3941  | -0.3314 | -0.7150 |
| mmu-miR-7077-3p | -0.7007 | -0.4108 | 0.2728  | 0.2861  |

|                 |         |         |         |         |
|-----------------|---------|---------|---------|---------|
| mmu-miR-7078-5p | 0.3144  | 0.0090  | -0.3594 | -0.7570 |
| mmu-miR-7080-3p | 0.0441  | 0.4926  | -0.1293 | -0.6827 |
| mmu-miR-7080-5p | 0.3925  | 0.1437  | -0.0618 | -0.2132 |
| mmu-miR-7083-5p | 0.7577  | 0.2086  | -0.4198 | -0.4442 |
| mmu-miR-709     | 0.1446  | 0.3173  | -0.3592 | 0.1150  |
| mmu-miR-7117-3p | 0.2317  | 0.0848  | 0.3474  | -0.3565 |
| mmu-miR-7117-5p | 0.4704  | 0.5369  | -0.3236 | -0.8942 |
| mmu-miR-7118-3p | -0.0867 | 0.6547  | -0.0220 | -0.3478 |
| mmu-miR-7212-5p | -0.0067 | -0.3445 | 0.3829  | -0.4525 |
| mmu-miR-7213-5p | 0.6353  | 0.2892  | -0.2421 | -0.4106 |
| mmu-miR-7219-3p | -0.0855 | -0.8610 | -0.2876 | 0.9810  |
| mmu-miR-7220-5p | -0.3935 | 0.0585  | -0.2328 | -0.2816 |
| mmu-miR-7235-3p | -0.2023 | 0.3220  | 0.1590  | 0.0810  |
| mmu-miR-7236-3p | 0.3826  | 0.1579  | 0.0967  | -0.1502 |
| mmu-miR-758-5p  | 0.3874  | 0.0337  | 0.3411  | 0.1475  |
| mmu-miR-760-3p  | 0.4460  | 0.2136  | 0.0177  | 0.0086  |
| mmu-miR-760-5p  | 0.3639  | -0.0670 | -0.0226 | 0.3717  |
| mmu-miR-7647-3p | 0.4731  | -0.0573 | -0.0461 | 0.5201  |
| mmu-miR-7648-3p | -0.5758 | -0.2528 | 0.2700  | 0.0315  |
| mmu-miR-7651-5p | 0.4261  | 0.5308  | -0.4429 | 0.0119  |
| mmu-miR-7654-5p | -0.2112 | -0.5474 | 0.2877  | 0.4495  |
| mmu-miR-7656-5p | 0.1683  | 0.5059  | 0.1137  | -0.0192 |
| mmu-miR-7661-3p | 0.1064  | -0.4668 | 0.0858  | -0.2044 |
| mmu-miR-7662-3p | 0.2198  | -0.4080 | -0.5270 | -0.3947 |
| mmu-miR-7664-5p | -0.6358 | -0.2870 | 0.0323  | -0.0891 |
| mmu-miR-7666-5p | -0.0908 | -0.1525 | -0.2227 | 0.0917  |
| mmu-miR-7673-5p | 0.4328  | 0.2358  | -0.5305 | -0.6034 |
| mmu-miR-7688-5p | 0.0527  | 0.1613  | 0.0875  | -0.4744 |
| mmu-miR-7a-2-3p | 0.1817  | 0.2222  | 0.1806  | 0.0627  |
| mmu-miR-7b-3p   | -0.6719 | -0.0569 | -0.0597 | 0.1521  |
| mmu-miR-8097    | 0.3672  | -0.0437 | -0.4986 | -0.0723 |
| mmu-miR-8103    | -0.3580 | -0.0434 | -0.2334 | -0.1500 |
| mmu-miR-8105    | 0.1927  | -0.1355 | -0.1926 | -0.6959 |
| mmu-miR-8111    | -0.4561 | 0.1094  | -0.1579 | 0.0336  |
| mmu-miR-8117    | -0.1647 | 0.6067  | -0.5217 | -0.7053 |
| mmu-miR-872-3p  | -0.3803 | -0.1336 | 0.2088  | 0.2732  |
| mmu-miR-874-5p  | 0.0404  | -0.1499 | 0.1490  | 0.3411  |
| mmu-miR-877-5p  | 0.1808  | 0.1808  | -0.1271 | -0.3995 |
| mmu-miR-879-5p  | 0.2341  | -0.0065 | -0.0463 | 0.1760  |
| mmu-miR-92a-3p  | 0.1710  | -0.0302 | 0.2681  | 0.2274  |
| mmu-miR-92b-3p  | 0.0647  | 0.1077  | 0.1547  | 0.3737  |
| mmu-miR-96-5p   | -0.4238 | 0.9123  | -0.6687 | -2.7430 |
| mmu-miR-98-3p   | -0.3502 | -0.1240 | 0.1325  | 0.4043  |

---

## Supplementary Table 5. Differential miRNA list

| <b>name</b>      | <b>overlapping groups</b>                                                  |
|------------------|----------------------------------------------------------------------------|
| mmu-miR-103-1-5p | GFP resilient increase, and Cre control decrease                           |
| mmu-miR-7056-5p  | GFP resilient increase, and Cre control decrease                           |
| mmu-miR-7651-5p  | GFP resilient increase, and Cre control decrease                           |
| mmu-miR-216b-5p  | GFP resilient increase, and Cre susceptible decrease                       |
| mmu-miR-483-5p   | GFP resilient increase, and Cre susceptible decrease                       |
| mmu-miR-669k-5p  | GFP resilient increase, and Cre susceptible decrease                       |
| mmu-miR-7061-5p  | GFP resilient increase, and Cre susceptible decrease                       |
| mmu-miR-7080-3p  | GFP resilient increase, and Cre susceptible decrease                       |
| mmu-miR-7117-5p  | GFP resilient increase, and Cre susceptible decrease                       |
| mmu-miR-1941-5p  | Cre control decrease and Cre susceptible decrease                          |
| mmu-miR-1955-3p  | Cre control decrease and Cre susceptible decrease                          |
| mmu-miR-205-5p   | Cre control decrease and Cre susceptible decrease                          |
| mmu-miR-302b-3p  | Cre control decrease and Cre susceptible decrease                          |
| mmu-miR-32-3p    | Cre control decrease and Cre susceptible decrease                          |
| mmu-miR-375-3p   | Cre control decrease and Cre susceptible decrease                          |
| mmu-miR-6238     | Cre control decrease and Cre susceptible decrease                          |
| mmu-miR-6240     | Cre control decrease and Cre susceptible decrease                          |
| mmu-miR-669e-3p  | Cre control decrease and Cre susceptible decrease                          |
| mmu-miR-7043-3p  | Cre control decrease and Cre susceptible decrease                          |
| mmu-miR-214-3p   | GFP resilient increase, Cre control decrease, and Cre susceptible decrease |
| mmu-miR-214-5p   | GFP resilient increase, Cre control decrease, and Cre susceptible decrease |
| mmu-miR-224-5p   | GFP resilient increase, Cre control decrease, and Cre susceptible decrease |
| mmu-miR-487b-5p  | GFP resilient increase, Cre control decrease, and Cre susceptible decrease |
| mmu-miR-7066-5p  | GFP resilient increase, Cre control decrease, and Cre susceptible decrease |
| mmu-miR-8117     | GFP resilient increase, Cre control decrease, and Cre susceptible decrease |
| mmu-miR-3100-3p  | GFP resilient increase only                                                |
| mmu-miR-3544-5p  | GFP resilient increase only                                                |
| mmu-miR-412-3p   | GFP resilient increase only                                                |
| mmu-miR-6538     | GFP resilient increase only                                                |
| mmu-miR-6930-3p  | GFP resilient increase only                                                |
| mmu-miR-6955-5p  | GFP resilient increase only                                                |
| mmu-miR-6959-5p  | GFP resilient increase only                                                |
| mmu-miR-6967-3p  | GFP resilient increase only                                                |
| mmu-miR-698-3p   | GFP resilient increase only                                                |
| mmu-miR-6999-5p  | GFP resilient increase only                                                |
| mmu-miR-7016-5p  | GFP resilient increase only                                                |
| mmu-miR-7118-3p  | GFP resilient increase only                                                |
| mmu-miR-5114     | Cre control decrease only                                                  |
| mmu-miR-10a-5p   | Cre control decrease only                                                  |
| mmu-miR-1249-5p  | Cre control decrease only                                                  |
| mmu-miR-141-3p   | Cre control decrease only                                                  |
| mmu-miR-142-3p   | Cre control decrease only                                                  |
| mmu-miR-142-5p   | Cre control decrease only                                                  |
| mmu-miR-146a-5p  | Cre control decrease only                                                  |
| mmu-miR-147-3p   | Cre control decrease only                                                  |
| mmu-miR-153-5p   | Cre control decrease only                                                  |

|                   |                               |
|-------------------|-------------------------------|
| mmu-miR-155-5p    | Cre control decrease only     |
| mmu-miR-181d-3p   | Cre control decrease only     |
| mmu-miR-182-5p    | Cre control decrease only     |
| mmu-miR-183-5p    | Cre control decrease only     |
| mmu-miR-1964-5p   | Cre control decrease only     |
| mmu-miR-200a-3p   | Cre control decrease only     |
| mmu-miR-200a-5p   | Cre control decrease only     |
| mmu-miR-200b-3p   | Cre control decrease only     |
| mmu-miR-200b-5p   | Cre control decrease only     |
| mmu-miR-200c-3p   | Cre control decrease only     |
| mmu-miR-201-5p    | Cre control decrease only     |
| mmu-miR-203-3p    | Cre control decrease only     |
| mmu-miR-203-5p    | Cre control decrease only     |
| mmu-miR-20b-5p    | Cre control decrease only     |
| mmu-miR-217-5p    | Cre control decrease only     |
| mmu-miR-21a-5p    | Cre control decrease only     |
| mmu-miR-21b       | Cre control decrease only     |
| mmu-miR-223-5p    | Cre control decrease only     |
| mmu-miR-23a-5p    | Cre control decrease only     |
| mmu-miR-295-5p    | Cre control decrease only     |
| mmu-miR-3470a     | Cre control decrease only     |
| mmu-miR-3472      | Cre control decrease only     |
| mmu-miR-34c-3p    | Cre control decrease only     |
| mmu-miR-363-5p    | Cre control decrease only     |
| mmu-miR-429-3p    | Cre control decrease only     |
| mmu-miR-467a-3p   | Cre control decrease only     |
| mmu-miR-496a-5p   | Cre control decrease only     |
| mmu-miR-5107-3p   | Cre control decrease only     |
| mmu-miR-5126      | Cre control decrease only     |
| mmu-miR-5130      | Cre control decrease only     |
| mmu-miR-669a-3-3p | Cre control decrease only     |
| mmu-miR-6934-5p   | Cre control decrease only     |
| mmu-miR-6984-3p   | Cre control decrease only     |
| mmu-miR-7020-5p   | Cre control decrease only     |
| mmu-miR-7662-3p   | Cre control decrease only     |
| mmu-miR-7673-5p   | Cre control decrease only     |
| mmu-miR-8097      | Cre control decrease only     |
| mmu-miR-96-5p     | Cre control decrease only     |
| <hr/>             |                               |
| mmu-let-7b-5p     | Cre susceptible decrease only |
| mmu-miR-10b-5p    | Cre susceptible decrease only |
| mmu-miR-1187      | Cre susceptible decrease only |
| mmu-miR-1231-5p   | Cre susceptible decrease only |
| mmu-miR-1306-3p   | Cre susceptible decrease only |
| mmu-miR-132-5p    | Cre susceptible decrease only |
| mmu-miR-144-3p    | Cre susceptible decrease only |
| mmu-miR-144-5p    | Cre susceptible decrease only |
| mmu-miR-1947-5p   | Cre susceptible decrease only |
| mmu-miR-1957a     | Cre susceptible decrease only |
| mmu-miR-195a-3p   | Cre susceptible decrease only |
| mmu-miR-1981-5p   | Cre susceptible decrease only |

|                 |                               |
|-----------------|-------------------------------|
| mmu-miR-199a-5p | Cre susceptible decrease only |
| mmu-miR-2137    | Cre susceptible decrease only |
| mmu-miR-3067-3p | Cre susceptible decrease only |
| mmu-miR-3085-5p | Cre susceptible decrease only |
| mmu-miR-340-3p  | Cre susceptible decrease only |
| mmu-miR-340-5p  | Cre susceptible decrease only |
| mmu-miR-342-5p  | Cre susceptible decrease only |
| mmu-miR-344h-3p | Cre susceptible decrease only |
| mmu-miR-3475-3p | Cre susceptible decrease only |
| mmu-miR-451a    | Cre susceptible decrease only |
| mmu-miR-466h-3p | Cre susceptible decrease only |
| mmu-miR-466i-5p | Cre susceptible decrease only |
| mmu-miR-467e-3p | Cre susceptible decrease only |
| mmu-miR-495-3p  | Cre susceptible decrease only |
| mmu-miR-497-3p  | Cre susceptible decrease only |
| mmu-miR-5129-3p | Cre susceptible decrease only |
| mmu-miR-539-5p  | Cre susceptible decrease only |
| mmu-miR-551b-5p | Cre susceptible decrease only |
| mmu-miR-5626-3p | Cre susceptible decrease only |
| mmu-miR-574-5p  | Cre susceptible decrease only |
| mmu-miR-598-5p  | Cre susceptible decrease only |
| mmu-miR-6236    | Cre susceptible decrease only |
| mmu-miR-669c-5p | Cre susceptible decrease only |
| mmu-miR-669h-3p | Cre susceptible decrease only |
| mmu-miR-669h-5p | Cre susceptible decrease only |
| mmu-miR-669o-5p | Cre susceptible decrease only |
| mmu-miR-6897-3p | Cre susceptible decrease only |
| mmu-miR-6937-5p | Cre susceptible decrease only |
| mmu-miR-6948-3p | Cre susceptible decrease only |
| mmu-miR-6952-5p | Cre susceptible decrease only |
| mmu-miR-6965-3p | Cre susceptible decrease only |
| mmu-miR-6966-3p | Cre susceptible decrease only |
| mmu-miR-6994-3p | Cre susceptible decrease only |
| mmu-miR-7008-5p | Cre susceptible decrease only |
| mmu-miR-7013-3p | Cre susceptible decrease only |
| mmu-miR-7013-5p | Cre susceptible decrease only |
| mmu-miR-7019-5p | Cre susceptible decrease only |
| mmu-miR-7033-5p | Cre susceptible decrease only |
| mmu-miR-7038-3p | Cre susceptible decrease only |
| mmu-miR-7059-5p | Cre susceptible decrease only |
| mmu-miR-7073-5p | Cre susceptible decrease only |
| mmu-miR-7078-5p | Cre susceptible decrease only |
| mmu-miR-7688-5p | Cre susceptible decrease only |
| mmu-miR-8105    | Cre susceptible decrease only |
| mmu-miR-877-5p  | Cre susceptible decrease only |

---

## Supplementary Table 6. piRNA analysis

| name                | GFP control | GFP resilient | GFP susceptible | CRE control | CRE susceptible |
|---------------------|-------------|---------------|-----------------|-------------|-----------------|
| piR-16_DQ539904     | 9839.67     | 9048.17       | 10670.25        | 10862.75    | 10696.25        |
| piR-24819_DQ557707  | 5770.83     | 5183.50       | 4570.25         | 5194.75     | 4616.25         |
| piR-134919_DQ719597 | 5252.58     | 5144.17       | 4834.50         | 5105.00     | 5630.00         |
| piR-1330_DQ541218   | 4474.83     | 4802.75       | 4077.25         | 4520.25     | 5843.63         |
| piR-22205_DQ555093  | 3925.00     | 3590.33       | 4033.25         | 3011.33     | 3943.25         |
| piR-104408_DQ689086 | 3749.33     | 3513.25       | 3696.75         | 3417.33     | 3240.38         |
| piR-1889_DQ541777   | 3381.33     | 3132.83       | 3007.75         | 2983.17     | 3580.88         |
| piR-137610_DQ722288 | 2362.50     | 2213.17       | 2377.50         | 2230.25     | 2071.38         |
| piR-120348_DQ705026 | 2195.83     | 2062.25       | 2740.75         | 2192.08     | 2371.38         |
| piR-1741_DQ541629   | 1011.67     | 910.42        | 877.75          | 972.08      | 869.88          |
| piR-1078_DQ540966   | 669.58      | 609.83        | 882.00          | 694.92      | 1170.25         |
| piR-127318_DQ711996 | 483.42      | 496.00        | 564.00          | 540.33      | 563.88          |
| piR-130848_DQ715526 | 437.25      | 447.17        | 543.00          | 481.00      | 477.00          |
| piR-119222_DQ703900 | 407.42      | 417.08        | 375.50          | 425.75      | 453.38          |
| piR-123453_DQ708131 | 328.08      | 325.42        | 432.75          | 317.33      | 343.63          |
| piR-1093_DQ540981   | 290.92      | 302.25        | 240.25          | 234.00      | 276.25          |
| piR-17872_DQ549760  | 240.42      | 238.58        | 232.50          | 210.33      | 262.50          |
| piR-1801_DQ541689   | 205.58      | 174.58        | 178.25          | 146.08      | 174.88          |
| piR-1096_DQ540984   | 166.42      | 146.75        | 141.00          | 139.17      | 145.00          |
| piR-515_DQ540403    | 135.67      | 160.42        | 208.00          | 286.92      | 647.25          |
| piR-974_DQ540862    | 115.25      | 102.25        | 143.00          | 117.83      | 111.00          |
| piR-26424_DQ559312  | 85.17       | 85.25         | 95.75           | 115.67      | 168.00          |
| piR-134593_DQ719271 | 81.25       | 79.75         | 59.00           | 90.25       | 92.00           |
| piR-112153_DQ696831 | 77.83       | 95.58         | 68.50           | 90.75       | 123.75          |
| piR-15293_DQ547181  | 76.08       | 203.42        | 164.75          | 72.92       | 56.25           |
| piR-524_DQ540412    | 51.00       | 64.00         | 55.50           | 57.08       | 44.63           |
| piR-1963_DQ541851   | 47.33       | 48.25         | 43.75           | 59.92       | 91.25           |
| piR-5001_DQ564913   | 45.92       | 53.42         | 63.25           | 84.00       | 139.75          |
| piR-13556_DQ545444  | 40.67       | 51.25         | 57.00           | 45.25       | 45.00           |
| piR-14718_DQ546606  | 40.17       | 36.25         | 53.75           | 43.50       | 80.25           |
| piR-341_DQ540229    | 37.00       | 31.92         | 32.75           | 39.17       | 61.13           |
| piR-1056_DQ540944   | 35.17       | 32.58         | 28.25           | 24.00       | 30.13           |
| piR-1225_DQ541113   | 34.92       | 40.83         | 49.75           | 48.00       | 79.13           |
| piR-638_DQ540526    | 27.67       | 37.92         | 57.75           | 53.58       | 117.13          |
| piR-134810_DQ719488 | 24.42       | 38.75         | 28.75           | 25.75       | 25.50           |
| piR-1361_DQ541249   | 23.08       | 20.58         | 26.25           | 22.67       | 27.25           |
| piR-109755_DQ694433 | 22.50       | 21.42         | 36.50           | 25.83       | 26.25           |
| piR-27_DQ539915     | 22.00       | 19.33         | 22.50           | 18.58       | 15.00           |
| piR-119101_DQ703779 | 19.83       | 21.83         | 23.50           | 33.58       | 31.88           |
| piR-1063_DQ540951   | 19.00       | 17.08         | 16.25           | 16.08       | 22.88           |
| piR-29217_DQ562105  | 17.67       | 13.42         | 13.75           | 15.50       | 13.13           |
| piR-19737_DQ551625  | 17.33       | 19.58         | 23.75           | 20.08       | 19.25           |
| piR-1212_DQ541100   | 17.33       | 14.00         | 31.25           | 33.17       | 35.88           |
| piR-26102_DQ558990  | 17.17       | 12.17         | 10.50           | 34.92       | 85.13           |
| piR-10908_DQ542796  | 16.42       | 16.67         | 30.25           | 20.75       | 35.25           |
| piR-18877_DQ550765  | 16.17       | 15.50         | 14.75           | 12.33       | 16.38           |
| piR-1100_DQ540988   | 15.25       | 14.50         | 12.50           | 13.83       | 14.63           |
| piR-965_DQ540853    | 14.83       | 18.83         | 14.00           | 17.25       | 22.25           |
| piR-2808_DQ552696   | 13.92       | 15.83         | 14.50           | 16.42       | 14.88           |
| piR-1088_DQ540976   | 13.42       | 16.33         | 12.25           | 18.42       | 29.13           |
| piR-25256_DQ558144  | 13.17       | 13.58         | 15.00           | 18.33       | 23.88           |
| piR-13616_DQ545504  | 12.58       | 11.33         | 9.00            | 8.83        | 9.50            |
| piR-20430_DQ553318  | 12.42       | 14.75         | 22.75           | 20.42       | 29.38           |

|                     |       |       |       |       |       |
|---------------------|-------|-------|-------|-------|-------|
| piR-28528_DQ561416  | 12.00 | 14.58 | 12.75 | 11.33 | 12.00 |
| piR-801_DQ540689    | 11.17 | 12.25 | 13.75 | 15.92 | 23.13 |
| piR-14820_DQ546708  | 10.75 | 12.75 | 17.50 | 18.25 | 32.38 |
| piR-25841_DQ558729  | 10.00 | 11.50 | 10.25 | 7.00  | 7.88  |
| piR-20521_DQ553409  | 9.67  | 10.25 | 17.50 | 25.58 | 46.13 |
| piR-165_DQ540053    | 9.42  | 10.25 | 14.25 | 13.50 | 22.75 |
| piR-14661_DQ546549  | 9.33  | 14.92 | 12.50 | 21.33 | 34.63 |
| piR-10470_DQ542358  | 9.17  | 9.00  | 17.00 | 13.25 | 14.13 |
| piR-28223_DQ561111  | 8.92  | 10.08 | 4.00  | 9.58  | 5.25  |
| piR-16295_DQ548183  | 7.92  | 16.92 | 21.25 | 16.25 | 34.88 |
| piR-1582_DQ541470   | 7.83  | 9.33  | 14.50 | 12.08 | 15.13 |
| piR-137131_DQ721809 | 7.42  | 5.17  | 6.75  | 5.17  | 7.13  |
| piR-113704_DQ698382 | 7.17  | 7.00  | 8.25  | 5.75  | 3.38  |
| piR-117191_DQ701869 | 6.92  | 7.83  | 7.00  | 7.00  | 6.63  |
| piR-19152_DQ551040  | 6.83  | 8.33  | 5.75  | 4.75  | 3.88  |
| piR-115623_DQ700301 | 6.67  | 8.25  | 3.75  | 6.83  | 7.00  |
| piR-984_DQ540872    | 6.42  | 8.17  | 8.50  | 11.17 | 22.50 |
| piR-1918_DQ541806   | 6.08  | 6.75  | 6.75  | 8.67  | 8.75  |
| piR-170_DQ540058    | 5.75  | 6.50  | 10.00 | 10.33 | 12.88 |
| piR-971_DQ540859    | 5.42  | 5.17  | 4.50  | 5.58  | 4.63  |
| piR-4034_DQ563946   | 5.33  | 5.50  | 5.25  | 10.33 | 22.50 |
| piR-16250_DQ548138  | 4.75  | 4.42  | 3.25  | 2.83  | 2.75  |
| piR-111167_DQ695845 | 4.33  | 2.25  | 4.50  | 3.92  | 2.88  |
| piR-1097_DQ540985   | 4.17  | 2.92  | 5.50  | 3.17  | 1.75  |
| piR-22995_DQ555883  | 4.08  | 4.33  | 2.75  | 4.42  | 5.13  |
| piR-22994_DQ555882  | 4.00  | 4.33  | 4.50  | 4.92  | 6.75  |
| piR-121779_DQ706457 | 3.67  | 3.17  | 2.50  | 3.33  | 2.00  |
| piR-19153_DQ551041  | 3.50  | 2.08  | 2.00  | 2.75  | 2.63  |
| piR-133519_DQ718197 | 3.50  | 3.25  | 3.00  | 3.50  | 4.38  |
| piR-8912_DQ568824   | 3.42  | 6.42  | 5.25  | 4.58  | 3.88  |
| piR-18370_DQ550258  | 2.83  | 3.33  | 3.50  | 2.50  | 3.50  |
| piR-108718_DQ693396 | 2.75  | 2.92  | 2.25  | 3.17  | 2.63  |
| piR-11019_DQ542907  | 2.75  | 1.83  | 2.75  | 3.08  | 2.50  |
| piR-141161_DQ725839 | 2.58  | 3.08  | 1.75  | 3.58  | 3.50  |
| piR-29251_DQ562139  | 2.58  | 4.83  | 5.50  | 5.00  | 7.63  |
| piR-1742_DQ541630   | 2.33  | 2.17  | 4.50  | 4.92  | 7.25  |
| piR-124682_DQ709360 | 2.33  | 2.75  | 2.00  | 0.83  | 0.88  |
| piR-892_DQ540780    | 1.92  | 2.67  | 4.50  | 4.25  | 2.38  |
| piR-5246_DQ565158   | 1.92  | 2.67  | 3.50  | 2.42  | 1.63  |
| piR-123760_DQ708438 | 1.83  | 2.42  | 1.75  | 2.33  | 2.88  |
| piR-38_DQ539926     | 1.75  | 3.42  | 4.00  | 5.00  | 9.75  |
| piR-1259_DQ541147   | 1.67  | 1.83  | 1.50  | 2.17  | 1.75  |
| piR-532_DQ540420    | 1.67  | 0.75  | 1.25  | 2.42  | 0.88  |
| piR-108575_DQ693253 | 1.58  | 1.00  | 1.25  | 1.67  | 1.63  |
| piR-9999_DQ569911   | 1.50  | 1.50  | 1.00  | 1.75  | 1.25  |
| piR-4846_DQ564758   | 1.42  | 1.83  | 0.25  | 2.00  | 1.88  |
| piR-132013_DQ716691 | 1.25  | 3.25  | 3.75  | 4.50  | 3.75  |
| piR-122946_DQ707624 | 1.08  | 2.50  | 0.50  | 1.42  | 0.63  |
| piR-44_DQ539932     | 1.08  | 1.25  | 0.50  | 0.83  | 1.25  |
| piR-972_DQ540860    | 1.08  | 1.17  | 1.25  | 1.75  | 1.38  |
| piR-129621_DQ714299 | 1.08  | 0.83  | 0.25  | 1.50  | 3.13  |
| piR-124734_DQ709412 | 1.08  | 1.42  | 1.75  | 1.42  | 1.25  |
| piR-1722_DQ541610   | 1.00  | 0.75  | 0.25  | 1.67  | 1.88  |
| piR-124393_DQ709071 | 0.92  | 0.83  | 0.25  | 0.92  | 0.88  |
| piR-106610_DQ691288 | 0.83  | 1.50  | 2.00  | 2.08  | 2.25  |
| piR-1075_DQ540963   | 0.75  | 0.42  | 0.25  | 0.25  | 0.13  |

|                     |      |      |      |      |      |
|---------------------|------|------|------|------|------|
| piR-110542_DQ695220 | 0.75 | 0.08 | 0.50 | 0.25 | 0.88 |
| piR-114142_DQ698820 | 0.75 | 0.17 | 0.00 | 0.17 | 0.00 |
| piR-129153_DQ713831 | 0.67 | 1.08 | 1.00 | 1.00 | 1.50 |
| piR-142288_DQ726966 | 0.58 | 0.25 | 0.75 | 0.33 | 0.25 |
| piR-122359_DQ707037 | 0.58 | 0.42 | 0.00 | 1.08 | 0.75 |
| piR-138557_DQ723235 | 0.50 | 0.42 | 1.25 | 1.33 | 1.13 |
| piR-138003_DQ722681 | 0.50 | 0.00 | 0.25 | 0.33 | 0.25 |
| piR-118815_DQ703493 | 0.50 | 0.67 | 0.50 | 0.42 | 0.88 |
| piR-115999_DQ700677 | 0.50 | 0.58 | 0.50 | 1.17 | 0.63 |
| piR-498_DQ540386    | 0.42 | 0.92 | 0.75 | 0.92 | 1.50 |
| piR-141064_DQ725742 | 0.42 | 0.58 | 1.00 | 0.17 | 0.38 |
| piR-139586_DQ724264 | 0.33 | 0.25 | 0.00 | 0.42 | 1.25 |
| piR-104208_DQ688886 | 0.33 | 0.08 | 0.00 | 0.17 | 0.25 |
| piR-123597_DQ708275 | 0.33 | 0.25 | 0.00 | 0.25 | 1.25 |
| piR-134043_DQ718721 | 0.25 | 0.17 | 0.00 | 0.33 | 0.00 |
| piR-122292_DQ706970 | 0.25 | 0.00 | 0.00 | 0.08 | 0.25 |
| piR-109800_DQ694478 | 0.25 | 0.33 | 0.75 | 0.25 | 0.63 |
| piR-142293_DQ726971 | 0.17 | 0.00 | 0.00 | 0.67 | 1.13 |
| piR-126231_DQ710909 | 0.17 | 0.08 | 0.00 | 0.42 | 0.75 |
| piR-131787_DQ716465 | 0.17 | 0.33 | 0.50 | 0.58 | 1.38 |
| piR-7260_DQ567172   | 0.17 | 0.42 | 0.50 | 0.33 | 0.00 |
| piR-18734_DQ550622  | 0.17 | 0.25 | 0.50 | 0.08 | 0.13 |
| piR-139362_DQ724040 | 0.17 | 0.00 | 0.50 | 0.58 | 0.38 |
| piR-137556_DQ722234 | 0.17 | 0.00 | 0.00 | 0.17 | 0.00 |
| piR-132386_DQ717064 | 0.17 | 0.08 | 0.50 | 0.25 | 0.00 |
| piR-127863_DQ712541 | 0.17 | 0.00 | 0.00 | 0.25 | 0.00 |
| piR-138718_DQ723396 | 0.17 | 0.00 | 0.00 | 1.08 | 0.50 |
| piR-138173_DQ722851 | 0.17 | 0.25 | 2.00 | 0.42 | 0.50 |
| piR-284_DQ540172    | 0.17 | 0.00 | 0.00 | 0.17 | 0.00 |
| piR-114034_DQ698712 | 0.08 | 0.00 | 0.25 | 0.08 | 0.13 |
| piR-13800_DQ545688  | 0.08 | 0.17 | 0.75 | 0.58 | 0.25 |
| piR-10297_DQ542185  | 0.08 | 0.08 | 0.00 | 0.17 | 0.00 |
| piR-17374_DQ549262  | 0.08 | 0.00 | 0.00 | 0.17 | 0.13 |
| piR-111521_DQ696199 | 0.08 | 0.67 | 0.00 | 0.42 | 0.13 |
| piR-114902_DQ699580 | 0.08 | 0.17 | 0.25 | 0.08 | 0.38 |
| piR-133781_DQ718459 | 0.00 | 0.00 | 0.00 | 0.17 | 0.00 |
| piR-110680_DQ695358 | 0.00 | 0.17 | 0.50 | 0.17 | 0.00 |
| piR-25028_DQ557916  | 0.00 | 0.00 | 0.00 | 0.17 | 0.00 |
| piR-23359_DQ556247  | 0.00 | 0.00 | 0.00 | 0.17 | 0.13 |
| piR-134739_DQ719417 | 0.00 | 0.00 | 0.00 | 0.08 | 0.00 |
| piR-1028_DQ540916   | 0.00 | 0.00 | 0.00 | 0.17 | 0.25 |
| piR-135049_DQ719727 | 0.00 | 0.00 | 0.00 | 0.17 | 0.00 |
| piR-141306_DQ725984 | 0.00 | 0.00 | 0.00 | 0.17 | 0.00 |
| piR-17384_DQ549272  | 0.00 | 0.00 | 0.00 | 0.17 | 0.00 |
| piR-126122_DQ710800 | 0.00 | 0.00 | 0.00 | 0.17 | 0.00 |
| piR-1430_DQ541318   | 0.00 | 0.00 | 0.00 | 0.08 | 0.00 |
| piR-120379_DQ705057 | 0.00 | 0.00 | 0.00 | 0.17 | 0.00 |
| piR-109306_DQ693984 | 0.00 | 0.00 | 0.00 | 0.17 | 0.00 |
| piR-121286_DQ705964 | 0.00 | 0.08 | 0.00 | 0.08 | 0.00 |
| piR-28179_DQ561067  | 0.00 | 0.00 | 0.00 | 0.17 | 0.00 |
| piR-109332_DQ694010 | 0.00 | 0.17 | 0.00 | 0.17 | 0.13 |
| piR-133950_DQ718628 | 0.00 | 0.00 | 0.00 | 0.17 | 0.25 |
| piR-2582_DQ552470   | 0.00 | 0.00 | 0.00 | 0.17 | 0.00 |
| piR-22259_DQ555147  | 0.00 | 0.00 | 0.00 | 0.08 | 0.00 |

---



## Supplementary Table 7. Differential piRNA list

| piRNA ID            | baseMean | log2FoldChange | pvalue | group                 |
|---------------------|----------|----------------|--------|-----------------------|
| piR-15293_DQ547181  | 127.278  | 1.058          | 0.000  | GFP res vs GFP con up |
| piR-132013_DQ716691 | 2.203    | 0.851          | 0.008  | GFP res vs GFP con up |
| piR-16295_DQ548183  | 10.434   | 0.677          | 0.023  | GFP res vs GFP con up |
| piR-122946_DQ707624 | 1.666    | 0.693          | 0.032  | GFP res vs GFP con up |
| piR-111521_DQ696199 | 0.349    | 0.619          | 0.036  | GFP res vs GFP con up |
| piR-29251_DQ562139  | 3.166    | 0.597          | 0.041  | GFP res vs GFP con up |
| piR-138173_DQ722851 | 0.525    | 1.381          | 0.001  | GFP sus vs GFP con up |
| piR-109755_DQ694433 | 25.762   | 0.591          | 0.007  | GFP sus vs GFP con up |
| piR-10908_DQ542796  | 17.361   | 0.603          | 0.011  | GFP sus vs GFP con up |
| piR-132013_DQ716691 | 1.912    | 1.024          | 0.014  | GFP sus vs GFP con up |
| piR-1582_DQ541470   | 9.209    | 0.651          | 0.018  | GFP sus vs GFP con up |
| piR-10470_DQ542358  | 9.436    | 0.623          | 0.020  | GFP sus vs GFP con up |
| piR-110680_DQ695358 | 0.078    | 0.546          | 0.047  | GFP sus vs GFP con up |
| piR-29217_DQ562105  | 14.884   | -0.423         | 0.013  | GFP res vs GFP con dn |
| piR-110542_DQ695220 | 0.447    | -0.660         | 0.023  | GFP res vs GFP con dn |
| piR-111167_DQ695845 | 3.305    | -0.709         | 0.025  | GFP res vs GFP con dn |
| piR-138003_DQ722681 | 0.226    | -0.571         | 0.028  | GFP res vs GFP con dn |
| piR-114142_DQ698820 | 0.435    | -0.655         | 0.036  | GFP res vs GFP con dn |
| piR-28223_DQ561111  | 7.408    | -0.964         | 0.005  | GFP sus vs GFP con dn |
| piR-115623_DQ700301 | 5.610    | -0.782         | 0.022  | GFP sus vs GFP con dn |
| piR-134593_DQ719271 | 74.188   | -0.434         | 0.027  | GFP sus vs GFP con dn |
| piR-4846_DQ564758   | 1.097    | -0.907         | 0.037  | GFP sus vs GFP con dn |

## Supplementary Table 8. Differential Rfam non-coding small RNA analysis

| Rfam database ID                               | baseMean | log2FoldChange | pvalue | group                    |
|------------------------------------------------|----------|----------------|--------|--------------------------|
| RF00005;tRNA;AAHY01203330.1/8173-8244          | 31.469   | 0.457          | 0.001  | GFP resilient increase   |
| RF00005;tRNA;AAHY01049942.1/76701-76768        | 2.098    | 0.871          | 0.002  | GFP resilient increase   |
| RF00005;tRNA;AC117740.12/109103-109033         | 11.024   | 0.737          | 0.004  | GFP resilient increase   |
| RF00418;SNORA58;CAAA01007162.1/23611-23476     | 2.347    | 0.751          | 0.006  | GFP resilient increase   |
| RF00005;tRNA;AAHY01214783.1/1422-1494          | 9.408    | 0.711          | 0.007  | GFP resilient increase   |
| RF00635;HAR1A;AAHY01013429.1/32-166            | 1.781    | 0.676          | 0.015  | GFP resilient increase   |
| RF00005;tRNA;AAHY01044463.1/52988-53050        | 8.247    | 0.582          | 0.020  | GFP resilient increase   |
| RF00155;SNORA66;AAHY01026490.1/8563-8690       | 10.056   | 0.417          | 0.027  | GFP resilient increase   |
| RF00005;tRNA;AC107738.16/7082-7148             | 13.687   | 0.503          | 0.028  | GFP resilient increase   |
| RF00005;tRNA;AL845293.5/44481-44543            | 252.645  | 0.389          | 0.033  | GFP resilient increase   |
| RF00005;tRNA;AL645470.20/98227-98296           | 0.880    | 0.563          | 0.037  | GFP resilient increase   |
| RF00619;U6atac;CAAA01116915.1/19758-19883      | 1.298    | 0.565          | 0.043  | GFP resilient increase   |
| RF00302;SNORA65;AAHY01091273.1/81327-81455     | 4.119    | 0.493          | 0.047  | GFP resilient increase   |
| RF00005;tRNA;AL603664.16/44902-44970           | 2.726    | 0.552          | 0.047  | GFP resilient increase   |
| RF00019;Y_RNA;CAAA01059689.1/54924-54815       | 5.934    | -0.770         | 0.001  | GFP resilient decrease   |
| RF00026;U6;CAAA01014608.1/6466-6564            | 3.731    | -0.766         | 0.003  | GFP resilient decrease   |
| RF00614;SNORA11;AAHY01122478.1/5461-5587       | 2.154    | -0.810         | 0.003  | GFP resilient decrease   |
| RF00017;Metazoa_SRP;AEKR01308876.1/2862-3151   | 20.854   | -0.453         | 0.004  | GFP resilient decrease   |
| RF00019;Y_RNA;AAHY01038354.1/15138-15025       | 13.124   | -0.506         | 0.007  | GFP resilient decrease   |
| RF00156;SNORA70;CAAA01106462.1/6203-6337       | 13.657   | -0.547         | 0.011  | GFP resilient decrease   |
| RF00570;SNORD64;AF357424.1/1-38                | 5.858    | -0.563         | 0.014  | GFP resilient decrease   |
| RF00005;tRNA;AAHY01099763.1/4904-4832          | 1.176    | -0.647         | 0.020  | GFP resilient decrease   |
| RF00005;tRNA;AC163684.5/188432-188360          | 0.897    | -0.613         | 0.024  | GFP resilient decrease   |
| RF00181;SNORD113;CAAA01088149.1/34836-34764    | 0.897    | -0.606         | 0.027  | GFP resilient decrease   |
| RF00005;tRNA;AAHY01085779.1/34674-34606        | 0.233    | -0.429         | 0.028  | GFP resilient decrease   |
| RF00410;SNORA2;AAHY01095829.1/3779-3643        | 10.041   | -0.458         | 0.028  | GFP resilient decrease   |
| RF00005;tRNA;AC124754.5/164270-164338          | 1.015    | -0.581         | 0.033  | GFP resilient decrease   |
| RF00429;SNORA29;CAAA01155162.1/4340-4220       | 0.831    | -0.540         | 0.040  | GFP resilient decrease   |
| RF00017;Metazoa_SRP;AAHY01138882.1/36573-36857 | 5.688    | -0.464         | 0.041  | GFP resilient decrease   |
| RF00049;SNORD36;AEKQ01056909.1/17858-17928     | 41.517   | 0.471          | 0.001  | GFP susceptible increase |
| RF00005;tRNA;AC124828.14/43577-43499           | 0.275    | 0.745          | 0.004  | GFP susceptible increase |
| RF00608;SNORD99;CAAA01052997.1/4014-4087       | 7856.730 | 0.473          | 0.005  | GFP susceptible increase |
| RF00005;tRNA;AAHY01139491.1/10543-10615        | 65.712   | 0.576          | 0.010  | GFP susceptible increase |
| RF00005;tRNA;AC107738.16/7082-7148             | 12.596   | 0.672          | 0.011  | GFP susceptible increase |
| RF00005;tRNA;AC124439.4/92685-92757            | 14.378   | 0.609          | 0.017  | GFP susceptible increase |
| RF00068;SNORD21;AEKQ01160438.1/254-161         | 2237.296 | 0.419          | 0.017  | GFP susceptible increase |
| RF00271;SNORD60;AAHY01131649.1/16031-16108     | 132.094  | 0.379          | 0.018  | GFP susceptible increase |
| RF00005;tRNA;AC153815.7/206527-206456          | 74.282   | 0.394          | 0.024  | GFP susceptible increase |
| RF00212;SNORD38;X94603.1/205-273               | 80.590   | 0.381          | 0.033  | GFP susceptible increase |
| RF00181;SNORD113;CAAA01088149.1/55188-55114    | 3.157    | 0.732          | 0.039  | GFP susceptible increase |
| RF00004;U2;AEKR01023484.1/5201-5301            | 0.175    | 0.381          | 0.041  | GFP susceptible increase |
| RF00604;SNORD88;AAHY01061119.1/48695-48784     | 27.259   | 0.497          | 0.045  | GFP susceptible increase |
| RF00045;SNORA73;AAHY01040498.1/1780-1984       | 3.795    | 0.666          | 0.049  | GFP susceptible increase |
| RF00019;Y_RNA;AEKR01196082.1/4486-4611         | 179.197  | -0.564         | 0.000  | GFP susceptible decrease |
| RF00019;Y_RNA;CAAA01059689.1/54924-54815       | 6.563    | -1.190         | 0.000  | GFP susceptible decrease |
| RF00408;SNORA1;AC155259.1/219269-219137        | 26.635   | -0.717         | 0.005  | GFP susceptible decrease |
| RF00105;SNORD115;AC169674.5/113799-113877      | 4.855    | -0.898         | 0.009  | GFP susceptible decrease |
| RF00005;tRNA;AC125170.3/36648-36712            | 3.320    | -0.917         | 0.013  | GFP susceptible decrease |
| RF00005;tRNA;AAHY01207664.1/126-55             | 2.977    | -0.904         | 0.013  | GFP susceptible decrease |
| RF00072;SNORA75;AAHY01008130.1/18060-18192     | 2.449    | -0.899         | 0.015  | GFP susceptible decrease |

|                                                     |         |        |       |                          |
|-----------------------------------------------------|---------|--------|-------|--------------------------|
| RF00026;U6;AC237159.3/17187-17083                   | 2.898   | -0.888 | 0.016 | GFP susceptible decrease |
| RF00005;tRNA;AC167669.1/101000-100929               | 1.154   | -0.825 | 0.017 | GFP susceptible decrease |
| RF00614;SNORA11;AAHY01122478.1/5461-5587            | 2.678   | -0.881 | 0.017 | GFP susceptible decrease |
| RF00412;SNORA21;AAHY01062763.1/181-45               | 12.387  | -0.617 | 0.021 | GFP susceptible decrease |
| RF00005;tRNA;AAHY01214783.1/1422-1494               | 5.158   | -0.758 | 0.026 | GFP susceptible decrease |
| RF00100;7SK;AEKQ01056522.1/18138-17824              | 1.728   | -0.809 | 0.027 | GFP susceptible decrease |
| RF00005;tRNA;AC093317.22/3280-3220                  | 9.336   | -0.640 | 0.035 | GFP susceptible decrease |
| RF00100;7SK;AAHY01133011.1/18689-18366              | 7.134   | -0.695 | 0.037 | GFP susceptible decrease |
| RF00019;Y_RNA;AAHY01038354.1/15138-15025            | 13.953  | -0.546 | 0.040 | GFP susceptible decrease |
| RF00400;SNORA28;FM991909.1/4-78                     | 1.231   | -0.712 | 0.045 | GFP susceptible decrease |
| RF00005;tRNA;AAHY01214783.1/1422-1494               | 4.634   | 0.765  | 0.003 | CRE control increase     |
| RF00019;Y_RNA;AEKQ01042019.1/1500-1391              | 13.136  | 0.635  | 0.009 | CRE control increase     |
| RF00019;Y_RNA;AAHY01038354.1/15138-15025            | 13.009  | 0.472  | 0.014 | CRE control increase     |
| RF00026;U6;AAHY01165013.1/650-756                   | 20.942  | 0.470  | 0.027 | CRE control increase     |
| RF00005;tRNA;AL596129.27/193665-193736              | 3.296   | 0.593  | 0.030 | CRE control increase     |
| RF00005;tRNA;AC143330.4/113005-112924               | 1.141   | 0.633  | 0.031 | CRE control increase     |
| RF00005;tRNA;AL589879.21/48271-48189                | 16.438  | 0.379  | 0.049 | CRE control increase     |
| RF00005;tRNA;AC114621.8/82602-82530                 | 11.561  | -0.865 | 0.000 | CRE control decrease     |
| RF00396;SNORA13;AC132358.3/106983-106852            | 3.231   | -1.008 | 0.000 | CRE control decrease     |
| RF00635;HAR1A;AAHY01013429.1/32-166                 | 2.004   | -0.935 | 0.002 | CRE control decrease     |
| RF00100;7SK;AC124727.4/37840-37508                  | 1.790   | -0.866 | 0.005 | CRE control decrease     |
| RF00005;tRNA;AL645470.20/98227-98296                | 1.072   | -0.869 | 0.005 | CRE control decrease     |
| RF01960;SSU_rRNA_eukarya;AAHY01051041.1/23270-21615 | 646.382 | -0.723 | 0.006 | CRE control decrease     |
| RF00017;Metazoa_SRP;AEKR01198626.1/4480-4835        | 1.569   | -0.829 | 0.007 | CRE control decrease     |
| RF00302;SNORA65;AC156290.10/22658-22538             | 1.238   | -0.814 | 0.009 | CRE control decrease     |
| RF00100;7SK;CAAA01027852.1/2046-1708                | 1.701   | -0.788 | 0.011 | CRE control decrease     |
| RF00020;U5;CAAA01107742.1/2808-2923                 | 0.319   | -0.607 | 0.014 | CRE control decrease     |
| RF01296;snoU85;AEKQ01124495.1/10065-10389           | 15.145  | -0.388 | 0.018 | CRE control decrease     |
| RF00100;7SK;AEKQ01097943.1/1159-1494                | 2.242   | -0.663 | 0.026 | CRE control decrease     |
| RF00100;7SK;AAHY01679013.1/385-682                  | 1.473   | -0.694 | 0.026 | CRE control decrease     |
| RF00005;tRNA;AC158953.8/179545-179616               | 5.662   | -0.608 | 0.026 | CRE control decrease     |
| RF00100;7SK;AAHY01133011.1/18689-18366              | 10.887  | -0.550 | 0.033 | CRE control decrease     |
| RF00100;7SK;AAHY01107339.1/3413-3734                | 2.125   | -0.655 | 0.033 | CRE control decrease     |
| RF00619;U6atac;AEKQ01196683.1/880-755               | 0.322   | -0.546 | 0.036 | CRE control decrease     |
| RF00016;SNORD14;AC104918.13/108869-108955           | 0.515   | -0.592 | 0.036 | CRE control decrease     |
| RF00005;tRNA;AC122236.5/130641-130711               | 0.232   | -0.467 | 0.038 | CRE control decrease     |
| RF00002;5_8S_rRNA;AEKQ01051589.1/322-180            | 120.445 | -0.433 | 0.039 | CRE control decrease     |
| RF00091;SNORA62;AEKQ01038831.1/8081-8217            | 2.044   | -0.622 | 0.040 | CRE control decrease     |
| RF00016;SNORD14;AAHY01784809.1/8784-8697            | 21.888  | -0.411 | 0.042 | CRE control decrease     |
| RF00100;7SK;AC160411.8/123410-123103                | 1.412   | -0.613 | 0.049 | CRE control decrease     |
| RF00610;SNORD110;CAAA01172599.1/18161-18094         | 107.193 | 0.472  | 0.000 | CRE susceptible increase |
| RF00093;SNORD18;AAHY01078834.1/8633-8566            | 52.275  | 0.501  | 0.000 | CRE susceptible increase |
| RF00581;SNORD12;AEKR01288051.1/604-693              | 99.525  | 0.499  | 0.001 | CRE susceptible increase |
| RF00019;Y_RNA;CAAA01059689.1/54924-54815            | 6.322   | 0.789  | 0.002 | CRE susceptible increase |
| RF00581;SNORD12;CAAA01140939.1/1570-1658            | 26.683  | 0.521  | 0.002 | CRE susceptible increase |
| RF00410;SNORA2;AAHY01095829.1/3779-3643             | 9.845   | 0.640  | 0.007 | CRE susceptible increase |
| RF00570;SNORD64;AF357424.1/1-38                     | 6.036   | 0.591  | 0.017 | CRE susceptible increase |
| RF00005;tRNA;AAHY01104766.1/148152-148047           | 4.689   | 0.576  | 0.037 | CRE susceptible increase |
| RF00019;Y_RNA;AAHY01038354.1/15138-15025            | 14.030  | 0.389  | 0.043 | CRE susceptible increase |
| RF00005;tRNA;AC129186.3/73645-73718                 | 2.694   | 0.580  | 0.048 | CRE susceptible increase |
| RF00005;tRNA;AAHY01072647.1/30980-30911             | 0.397   | 0.440  | 0.048 | CRE susceptible increase |
| RF00019;Y_RNA;AAHY01004943.1/242-131                | 2.495   | 0.584  | 0.049 | CRE susceptible increase |
| RF00190;SNORA16;CAAA01052997.1/2788-2923            | 13.173  | 0.386  | 0.049 | CRE susceptible increase |
| RF01960;SSU_rRNA_eukarya;AAHY01051041.1/23270-21615 | 980.190 | -1.495 | 0.000 | CRE susceptible decrease |

|                                                 |           |        |       |                          |
|-------------------------------------------------|-----------|--------|-------|--------------------------|
| RF01960;SSU_rRNA_eukarya;CT010467.6/67702-65856 | 11388.954 | -0.791 | 0.000 | CRE susceptible decrease |
| RF00002;5_8S_rRNA;AEKQ01042335.1/10197-10050    | 264.469   | -1.048 | 0.000 | CRE susceptible decrease |
| RF00002;5_8S_rRNA;AEKQ01051589.1/322-180        | 133.912   | -0.787 | 0.000 | CRE susceptible decrease |
| RF00100;7SK;AC124727.4/37840-37508              | 2.435     | -1.294 | 0.000 | CRE susceptible decrease |
| RF00181;SNORD113;CAAA01088149.1/3876-3802       | 38.597    | -0.499 | 0.000 | CRE susceptible decrease |
| RF01291;SNORD97;CAAA01084202.1/39331-39498      | 153.145   | -0.448 | 0.005 | CRE susceptible decrease |
| RF00100;7SK;AAHY01133011.1/18689-18366          | 11.359    | -0.715 | 0.005 | CRE susceptible decrease |
| RF00403;SNORA41;AAHY01006824.1/38495-38626      | 2893.652  | -0.446 | 0.006 | CRE susceptible decrease |
| RF00418;SNORA58;CAAA01007162.1/23611-23476      | 2.336     | -0.799 | 0.007 | CRE susceptible decrease |
| RF00017;Metazoa_SRP;AAHY01074224.1/12820-13064  | 51.391    | -0.395 | 0.008 | CRE susceptible decrease |
| RF00045;SNORA73;AAHY01040498.1/1780-1984        | 4.147     | -0.657 | 0.015 | CRE susceptible decrease |
| RF00005;tRNA;AL645470.20/98227-98296            | 0.930     | -0.690 | 0.018 | CRE susceptible decrease |
| RF00005;tRNA;AC124828.14/43577-43499            | 0.234     | -0.466 | 0.021 | CRE susceptible decrease |
| RF00005;tRNA;AL603664.16/44902-44970            | 2.496     | -0.663 | 0.025 | CRE susceptible decrease |
| RF00017;Metazoa_SRP;AEKR01198626.1/4480-4835    | 1.438     | -0.664 | 0.026 | CRE susceptible decrease |
| RF00005;tRNA;AC114621.8/82602-82530             | 9.430     | -0.454 | 0.029 | CRE susceptible decrease |
| RF00003;U1;AEKQ01148046.1/76773-76921           | 2.491     | -0.623 | 0.031 | CRE susceptible decrease |
| RF00005;tRNA;AAHY01015265.1/1103-1033           | 0.677     | -0.585 | 0.034 | CRE susceptible decrease |
| RF00155;SNORA66;AAHY01038705.1/1850-1722        | 0.694     | -0.574 | 0.038 | CRE susceptible decrease |

## Supplementary Table 9. Statistics of main figures

| Figure panel | Statistics                                                                                                                                                                                  |
|--------------|---------------------------------------------------------------------------------------------------------------------------------------------------------------------------------------------|
| Figure 1b    | $F_{1,32}=4.12$ , * $P<0.05$ , two way ANOVA, effect of virus, n = 8-10                                                                                                                     |
| Figure 1c    | $t_{11}=2.21$ , * $P<0.05$ , two-tailed t-test, n=6-7                                                                                                                                       |
| Figure 1d    | Closed arms: $t_{11}=3.266$ , * $P<0.01$ , Open arms: $t_{11}=3.143$ , * $P<0.01$ two-tailed t-test, n=6-7                                                                                  |
| Figure 1e    | D2 Cre- vs. Cre+: $t_{20}=2.367$ , * $P<0.05$ , two-tailed t-test, n = 8-13                                                                                                                 |
| Figure 1f    | $F_{1,18}=9.08$ , ** $P<0.01$ , two way ANOVA, effect of virus only when target present, n=5,6                                                                                              |
| Figure 1g    | $F_{1,7}=10.54$ , * $P<0.05$ , two way ANOVA, interaction effect, n=4-5                                                                                                                     |
| Figure 2a    | Axin2: $t_{14}=3.959$ , ** $P<0.01$ ; TCF3: $t_{14}=2.407$ , * $P<0.05$ ; TCF4: $t_{14}=2.669$ , * $P<0.05$ , two-tailed t-test, n=6-10                                                     |
| Figure 2b    | TCF3: $F_{2,34}=3.547$ , * $P<0.05$ ; TCF4: $F_{2,34}=4.818$ , * $P<0.05$ , n=9-16                                                                                                          |
| Figure 2c    | Axin2 D2(+): $F_{2,9}=9.86$ , ** $p<0.01$ , control vs. resilient $p<0.05$ , susceptible vs. resilient, $p<0.01$ , n=3-5; Axin2 D2(-): $F_{2,8}=1.64$ , NS, $P>0.05$ , n=3-5, one way ANOVA |
| Figure 2d    | $t_4=4.683$ , ** $P<0.01$ , two-tailed t-test, n=3/group                                                                                                                                    |
| Figure 2f    | Axin2: $t_9=2.37$ , * $P<0.05$ , n=5-6; TCF3: $t_8=3.782$ , ** $P<0.01$ , n=4-6; TCF4: $t_8=3.549$ , ** $P<0.01$ , n=4-6, two-tailed t-test                                                 |
| Figure 3a    | $F_{2,9}=7.808$ , * $P<0.05$ , 1-way ANOVA, post-hoc test control vs. resilient and susceptible vs. resilient at LEFF TFBS, * $P<0.05$ , n=4/group                                          |
| Figure 3f    | Gadd45a: $F_{2,8}=11.14$ , * $P<0.05$ , 1 way ANOVA; Dicer1: $F_{2,8}=6.702$ , * $P<0.05$ , 1 way ANOVA, n=3-4                                                                              |
| Figure 3g    | Dicer1: $F_{2,28}=6.046$ , * $P<0.01$ , 1-way ANOVA, n=7-13                                                                                                                                 |
| Figure 4b    | $F_{1,26}=8.535$ , ** $P<0.01$ , effect of virus, n=7-8, two-way ANOVA                                                                                                                      |
| Figure 4c    | $F_{1,12}=4.913$ , * $P<0.05$ , interaction effect, matching two-way ANOVA, n=7/group                                                                                                       |

**Supplementary Notes: Some detailed statistic analysis results from main text.**

- 1. FST results after  $\beta$ -catenin S33Y mutant overexpression in mouse NAc:**  
time immobile in seconds: HSV-GFP  $211 \pm 6$ , HSV-S33Y  $175 \pm 11$ ,  $P < 0.05$ ,  
two-tailed t-test,  $n = 9$ /group.
- 2. ASD social interaction results after  $\beta$ -catenin S33Y mutant overexpression in mouse NAc:** SI time with target present in seconds: HSV-GFP  $10.3 \pm 3.6$ , HSV-S33Y  $39.6 \pm 8.7$ ,  $P < 0.05$ , two-tailed t-test,  $n = 7-8$ /group.
- 3. Elevated levels of Axin2 in resilient mice 10 day post CSDS:** resilient:  $131\% \pm 5.3\%$  of control,  $P < 0.05$ ; susceptible:  $116\% \pm 7.5\%$  of control,  $p > 0.05$ , 1 way ANOVA,  $n = 6-8$ /group.
